# Supplementary material for: Natural history of Ebola virus disease in rhesus monkeys shows viral variant emergence dynamics and tissue-specific host responses
Source: PubMed Central journal article supplement (PMC10759212; doi:10.1016/j.xgen.2023.100440), 2023-11-21
Supplement: mmc1.pdf [file mmc1.pdf]

## Supplemental information

### **Natural history of Ebola virus disease in rhesus monkeys shows viral variant emergence dynamics and tissue-specific host responses**

**Erica Normandin, Sergio Triana, Siddharth S. Raju, Tammy C.T. Lan, Kim Lagerborg, Melissa Rudy, Gordon C. Adams, Katherine C. DeRuff, James Logue, David Liu, Daniel Strebing, Arya Rao, Katelyn S. Messer, Molly Sacks, Ricky D. Adams, Krisztina Janosko, Dylan Kotliar, Rickey Shah, Ian Crozier, John L. Rinn, Marta Melé, Anna N. Honko, Feng Zhang, Mehrtash Babadi, Jeremy Luban, Richard S. Bennett, Alex K. Shalek, Nikolaos Barkas, Aaron E. Lin, Lisa E. Hensley, Pardis C. Sabeti, and Katherine J. Siddle**

# Supplemental Figures

Supplemental figures for “Natural history of Ebola virus disease in rhesus monkeys shows viral variant emergence dynamics and tissue specific host responses” by Normandin et al.

## **Figures Contents**

Figure S1. qPCR quantification compared to viral read counts.

Figure S2. Overview of samples profiled.

Figure S3. Host transcriptome dimensionality reduction.

Figure S4. Expression profiles during infections across tissues

Figure S5. Viral load correlates with monocyte markers.

Figure S6. Cell type deconvolution of Bulk RNA-seq.

Figure S7. Tissue specific marker genes.

Figure S8. Genes change across time.

Figure S9. ECM and Coagulation related genes change across time and tissues.

Figure S10. Reliability of minor variant calling methodology.

Figure S11. Mutation types across the sample set.

Figure S12. Mutations across animals and tissues.

Figure S13. Functional characterization of viral variants

Figure S14. Utilizing Time-series Covariate Information for Enhanced RNA-seq Deconvolution

Data S1: Pentacistronic Minigenome Assay plasmid sequences, related to STAR methods.

A.

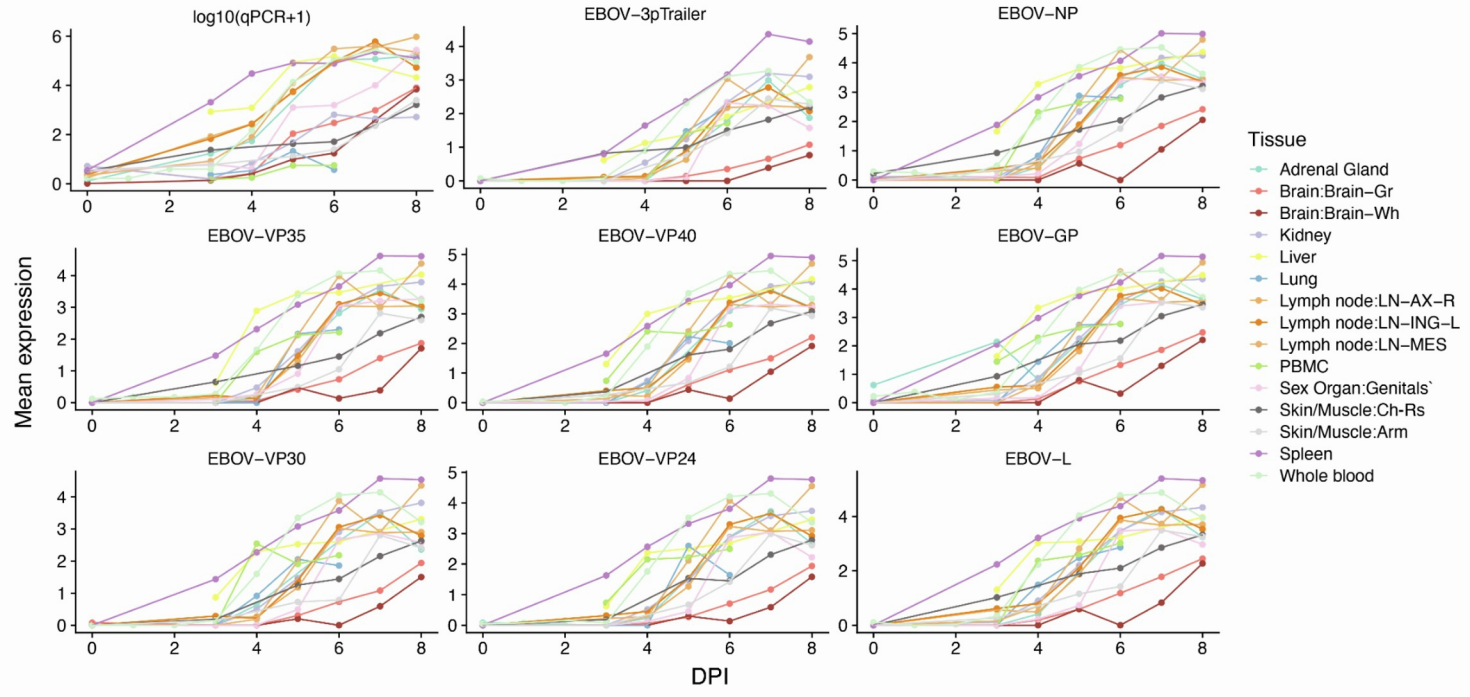

B.

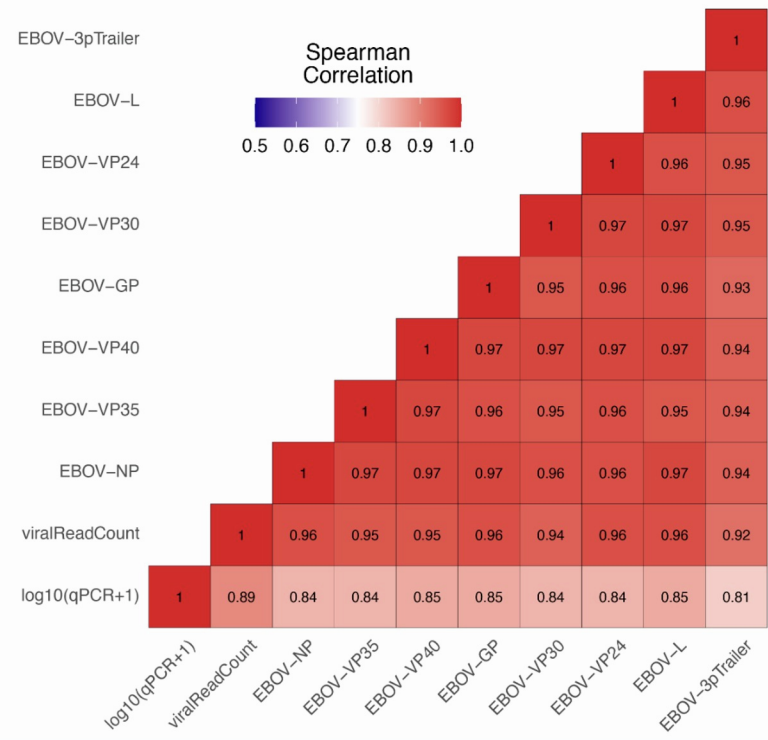

C.

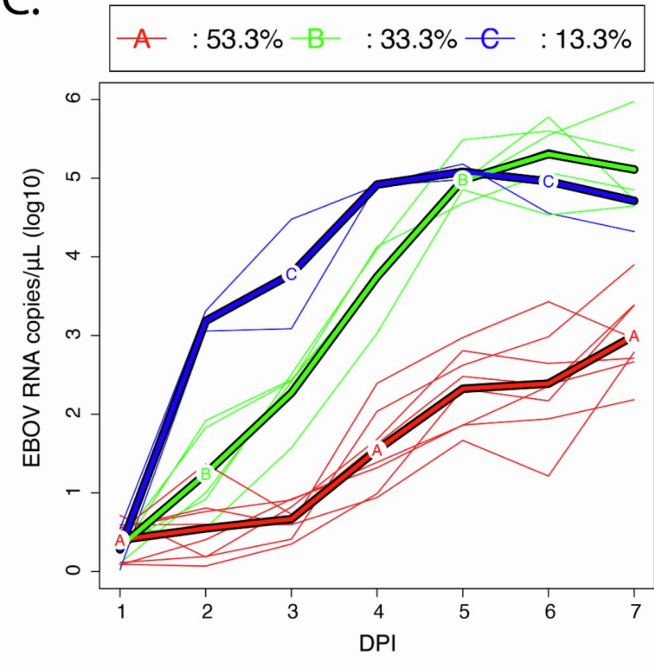

**Figure S1. qPCR quantification compared to viral read counts, related to figure 1. (A)** Mean expression of viral genes across tissues and DPI **(B)** Heatmap showing spearman correlations between each viral gene, the total viral read count and the qPCR quantification of GP RNA. **(C)** Longitudinal K-mean clustering of qPCR data.

A.

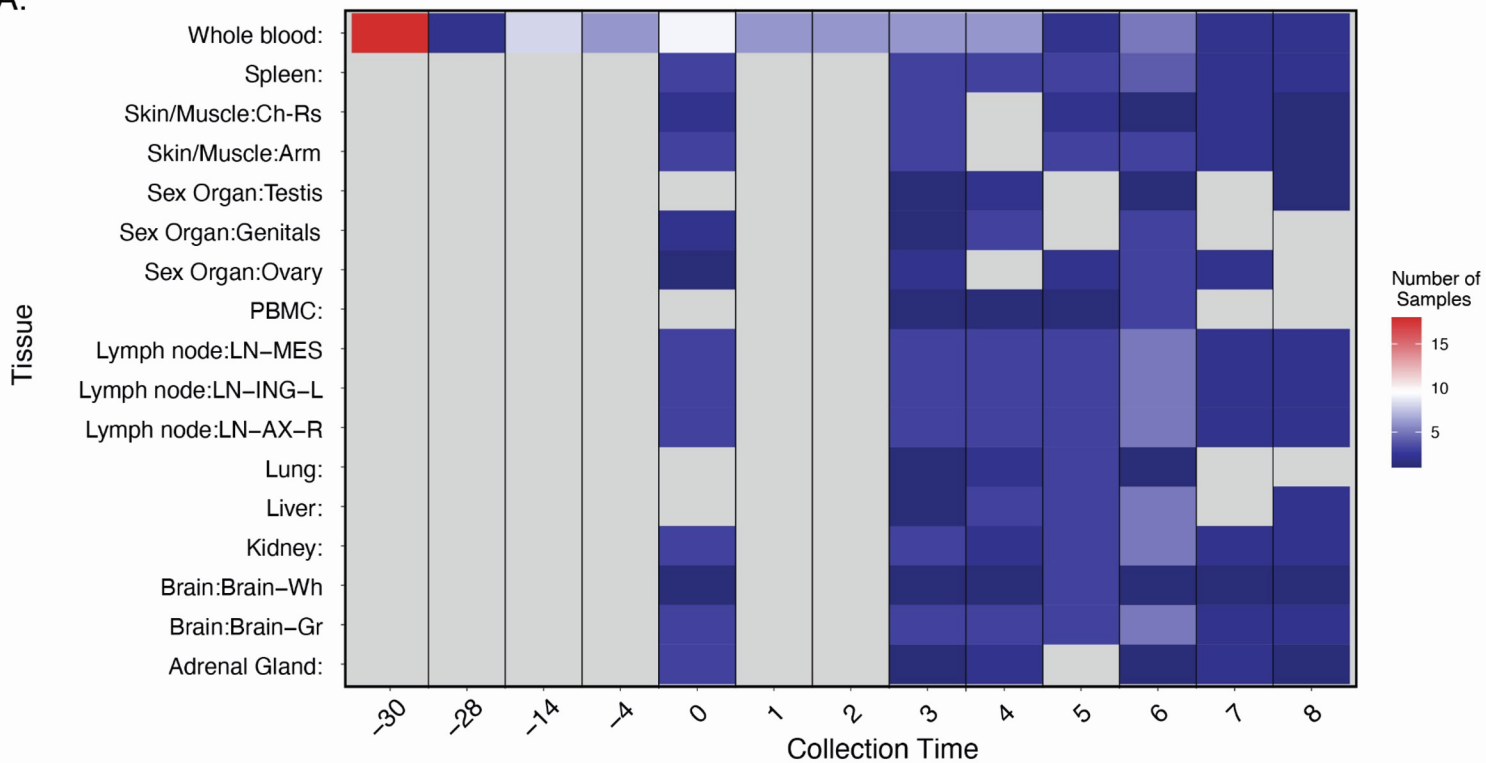

B.

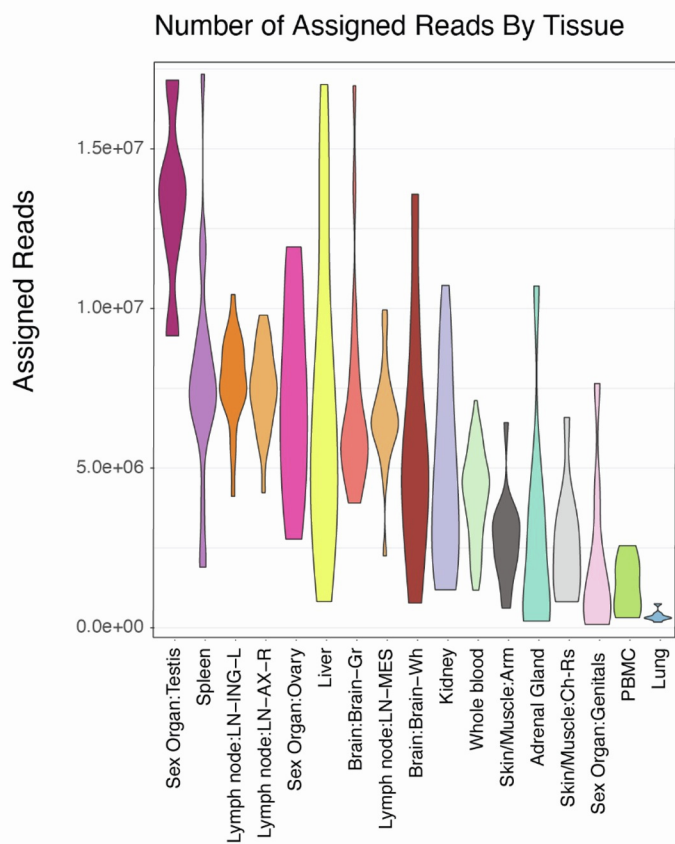

C.

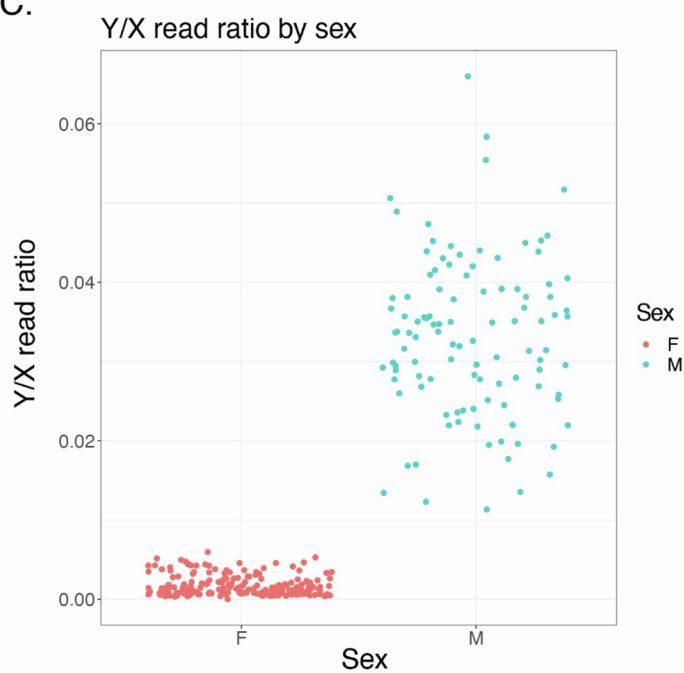

**Figure S2. Overview of samples profiled, related to figure 1.** (A) Sequenced sample count per tissue and collection time (B) Violin plots of total assigned reads per tissue. (C) Chromosome X and Y ratio per sample.



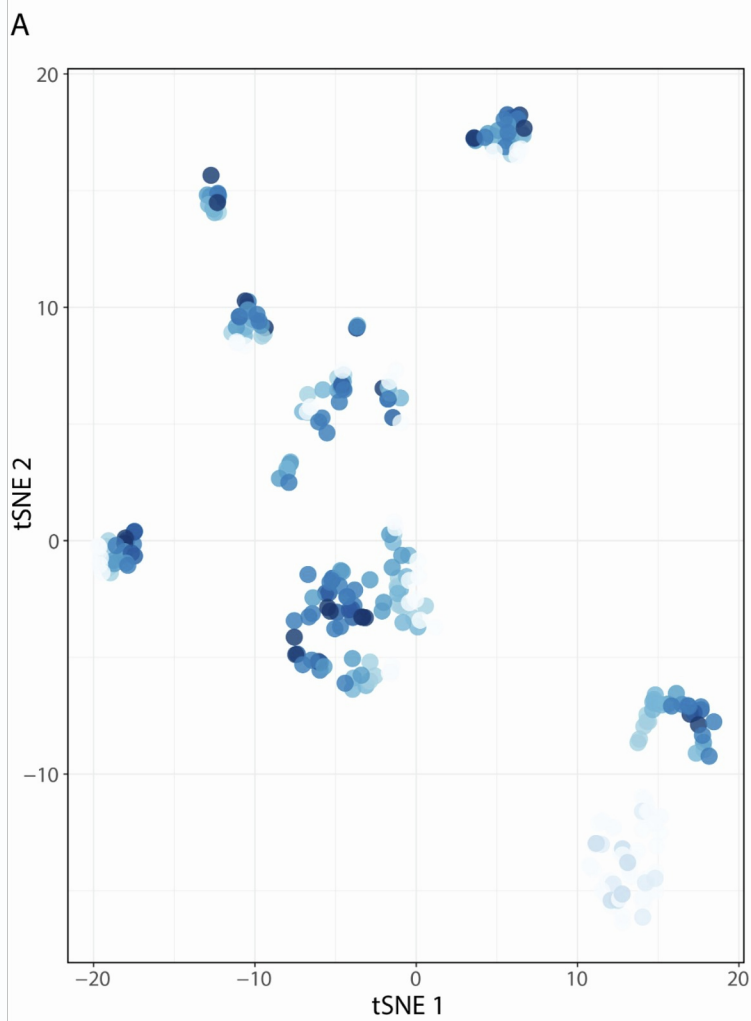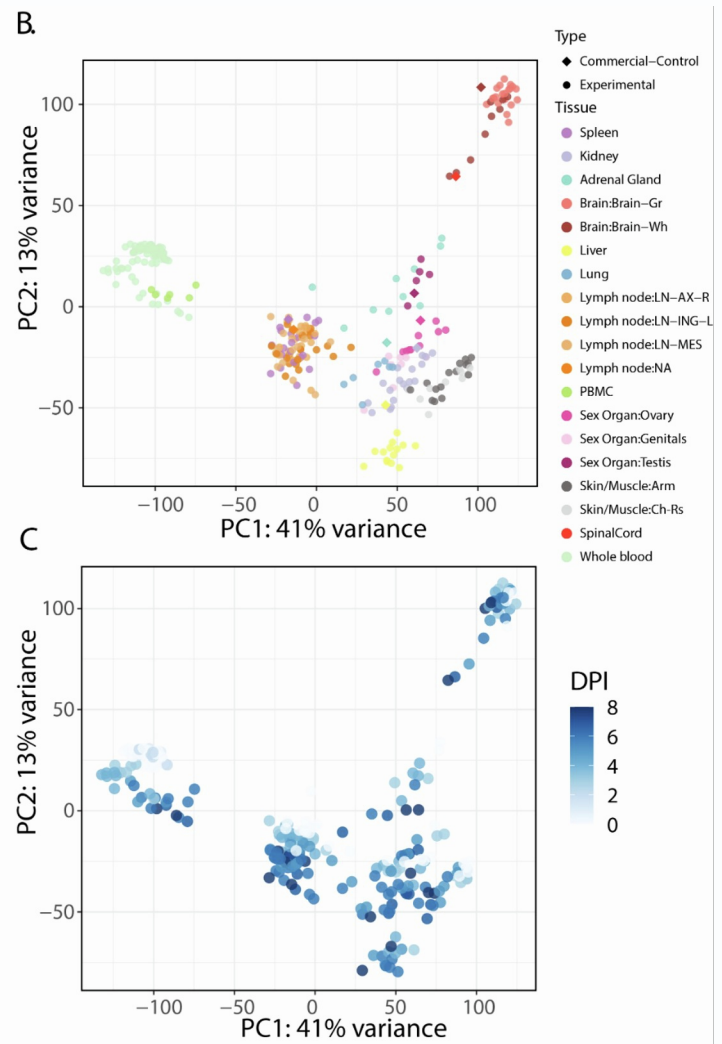

**Figure S3. Host transcriptome dimensionality reduction, related to figure 1. (A)** tSNE plot of transcriptional signatures colored by DPI. PCA of transcriptional profiles colored by (B) sample type and (C) DPI.

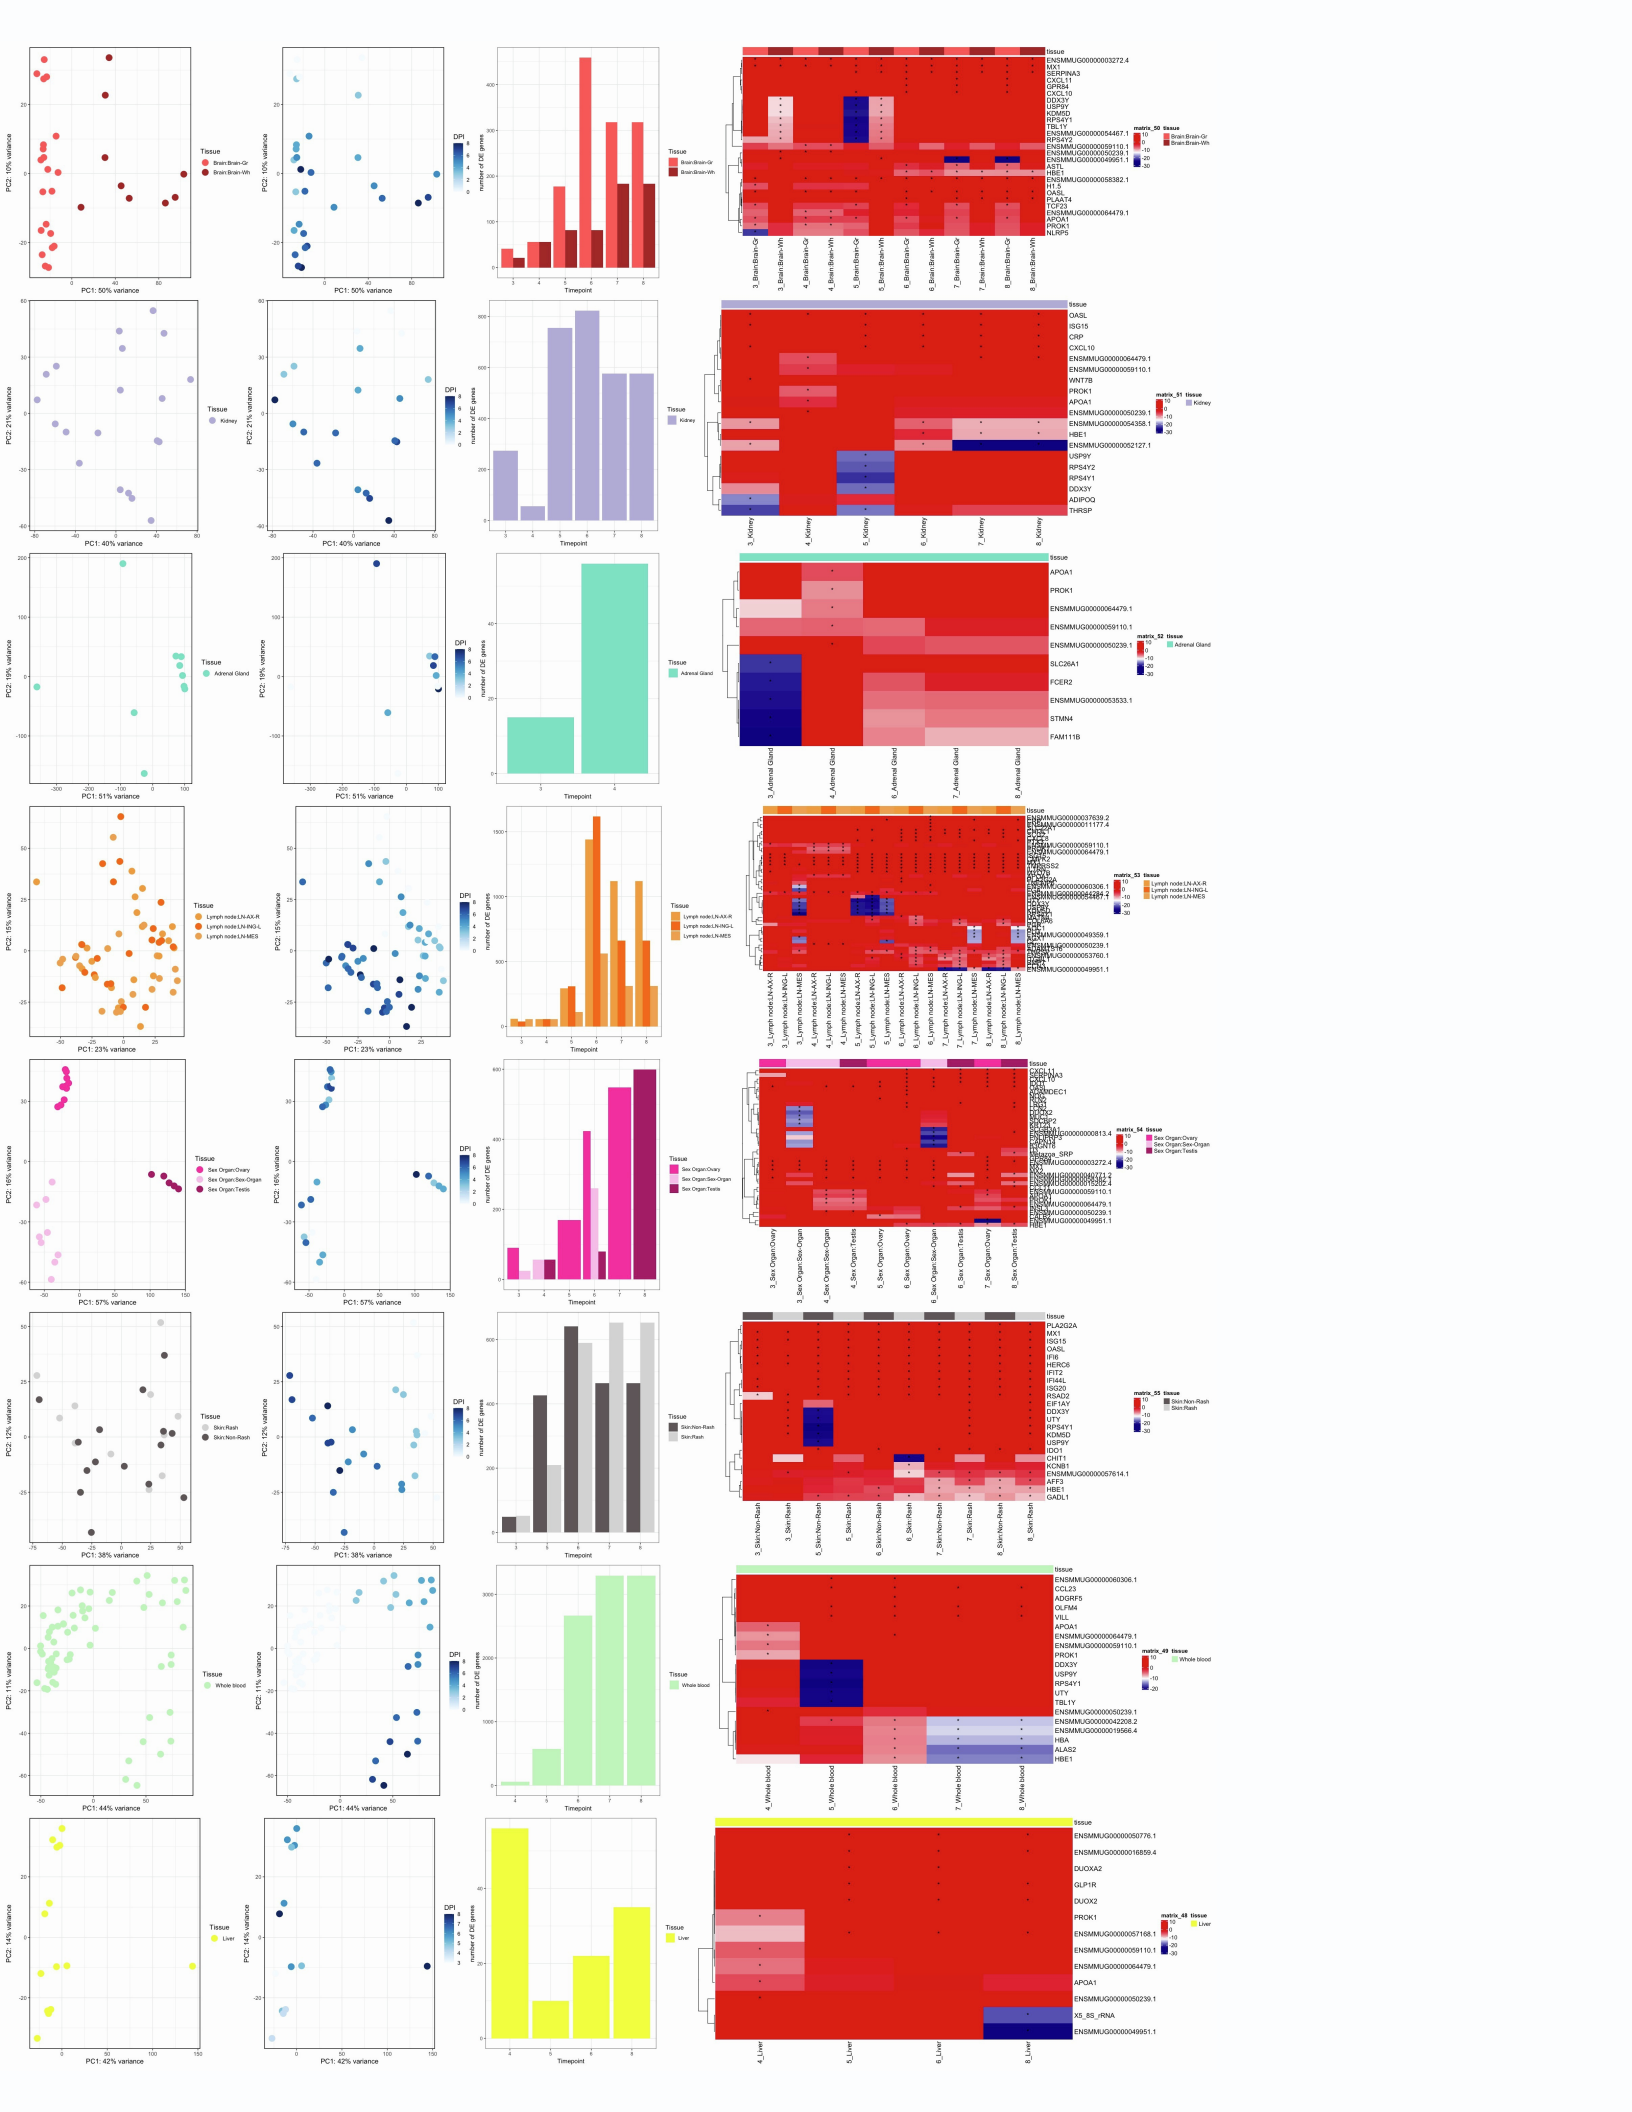

**Figure S4. Expression profiles during infections across tissues related to figure 3.** Right, PCA of transcriptional profiles of each tissue colored by sample type and DPI. Center, Number of differentially expressed genes between non-infected and each time point. Heatmap of Fold-changes of Top DE genes in each time point and tissue

**A.**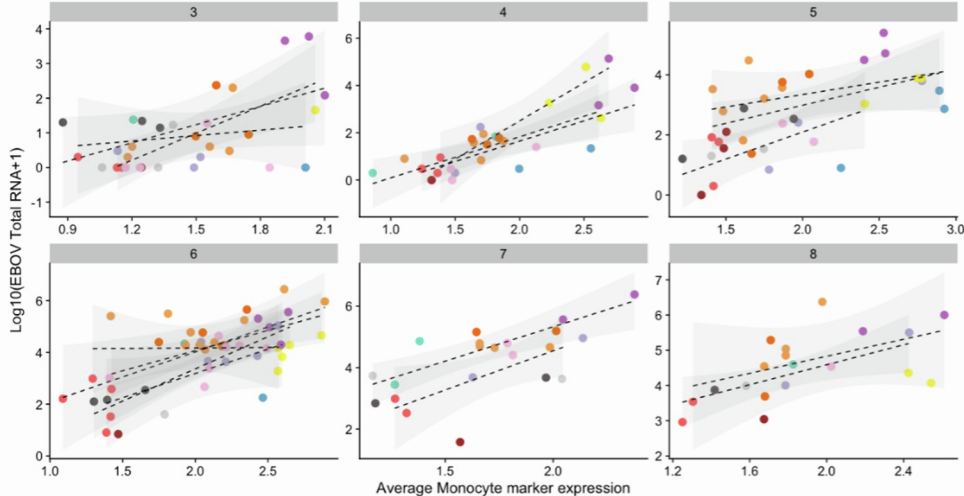**C.**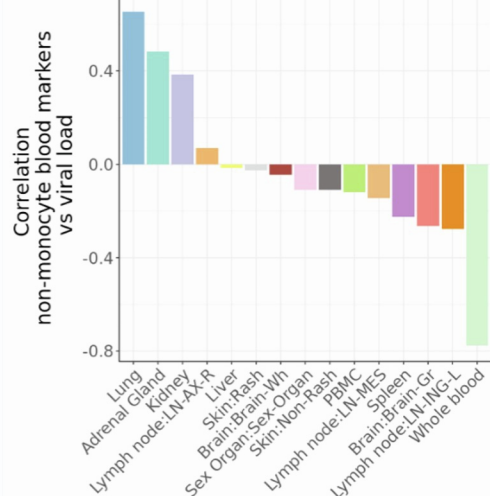**B.**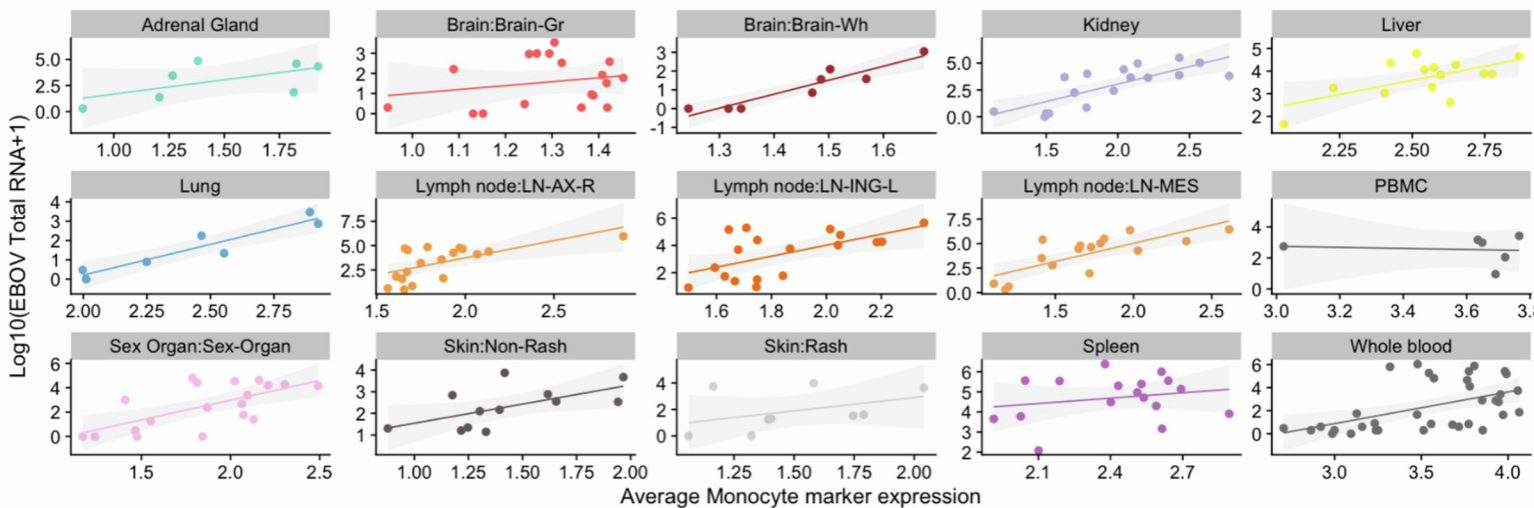

**Figure S5. Viral load correlates with monocyte markers, related to figure 2.** (A) Total viral counts compare to the average expression of canonical monocyte markers (*CTSS*, *VCAN*, *FCN1*, *CD14*, *S100A9*) across each time by individual (A) and by tissue (B). (C) Correlation between viral load and non-monocyte blood markers (*CD3D*, *HBA*, *SELL*, *PPBP*, *HBA*, *CD8A*, *GPLY*, *CD4*) expression across each tissue.

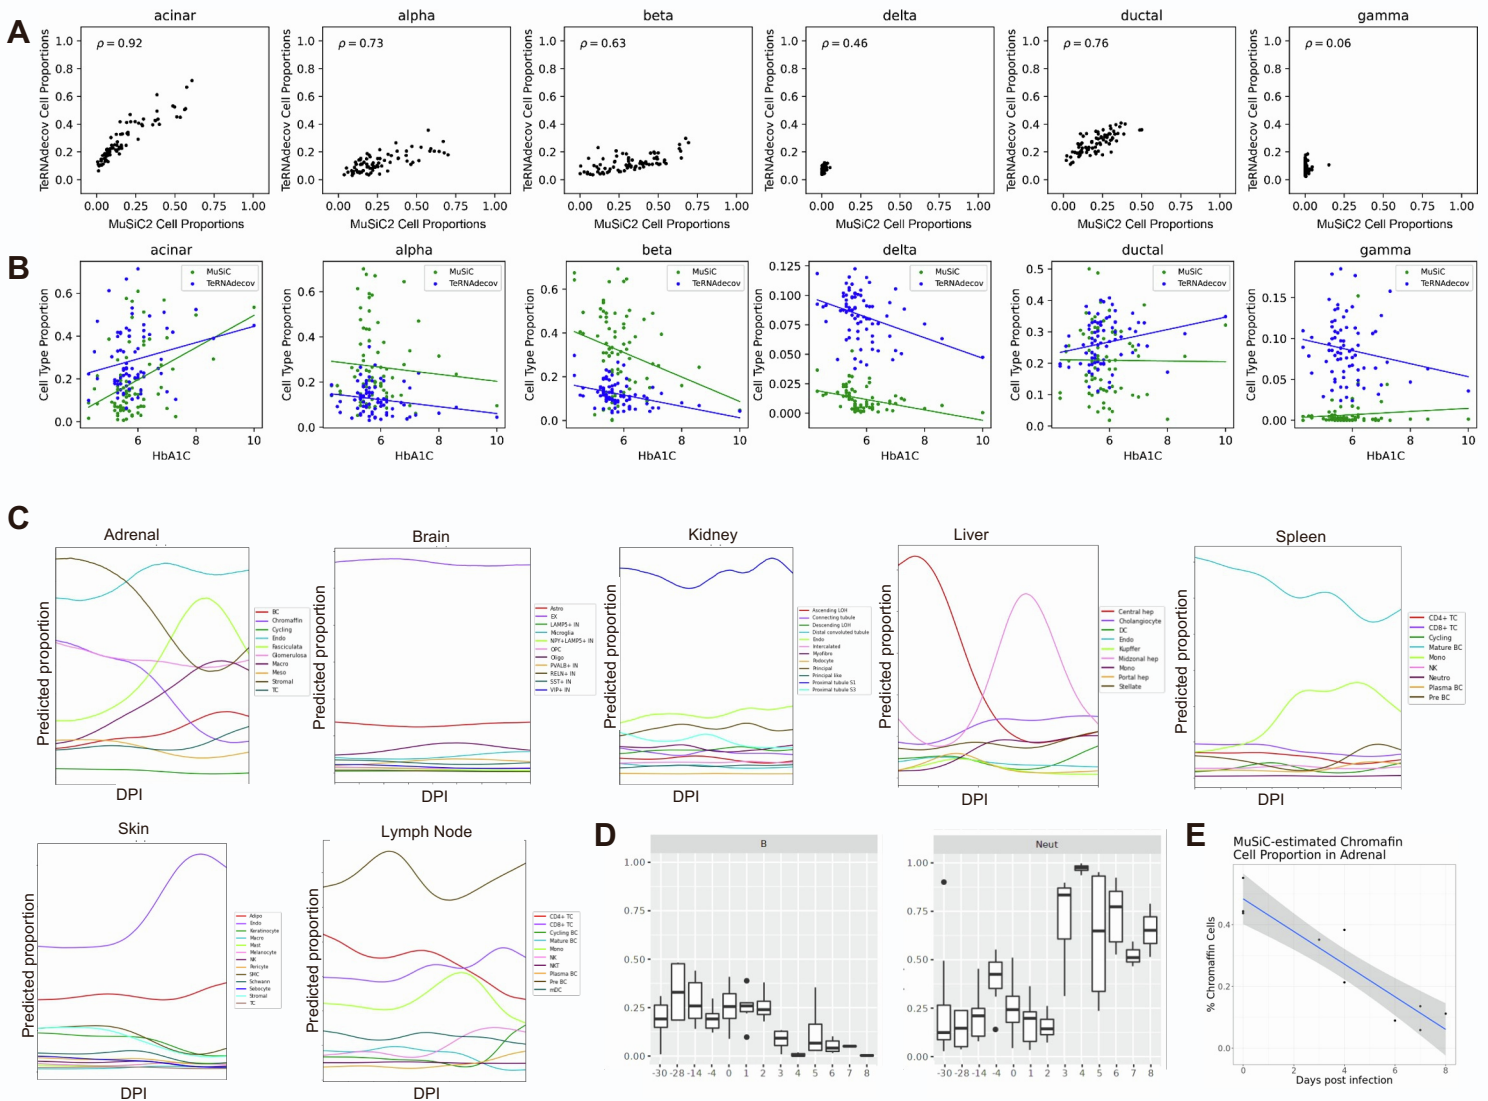

**Figure S6. Cell type deconvolution of Bulk RNA-seq, related to figure 2.** A) Predicted cell type proportion for pancreatic islet bulk RNA-seq data from Fadista et al using ternaDecov and MuSiC2. B) Correlation of HbA1c level and cell-type composition C) Deconvolution of predicted cell types changes across time for each tissue based on a single-cell RNAseq reference of *Macaca fascicularis*. (D) Deconvolution of Whole Blood with MuSiC confirms Neutrophil peak at 4 DPI. (E) Deconvolution of adrenal tissues using MuSiC confirms the reduction of the relative proportion of Chromaffin cells during infection.



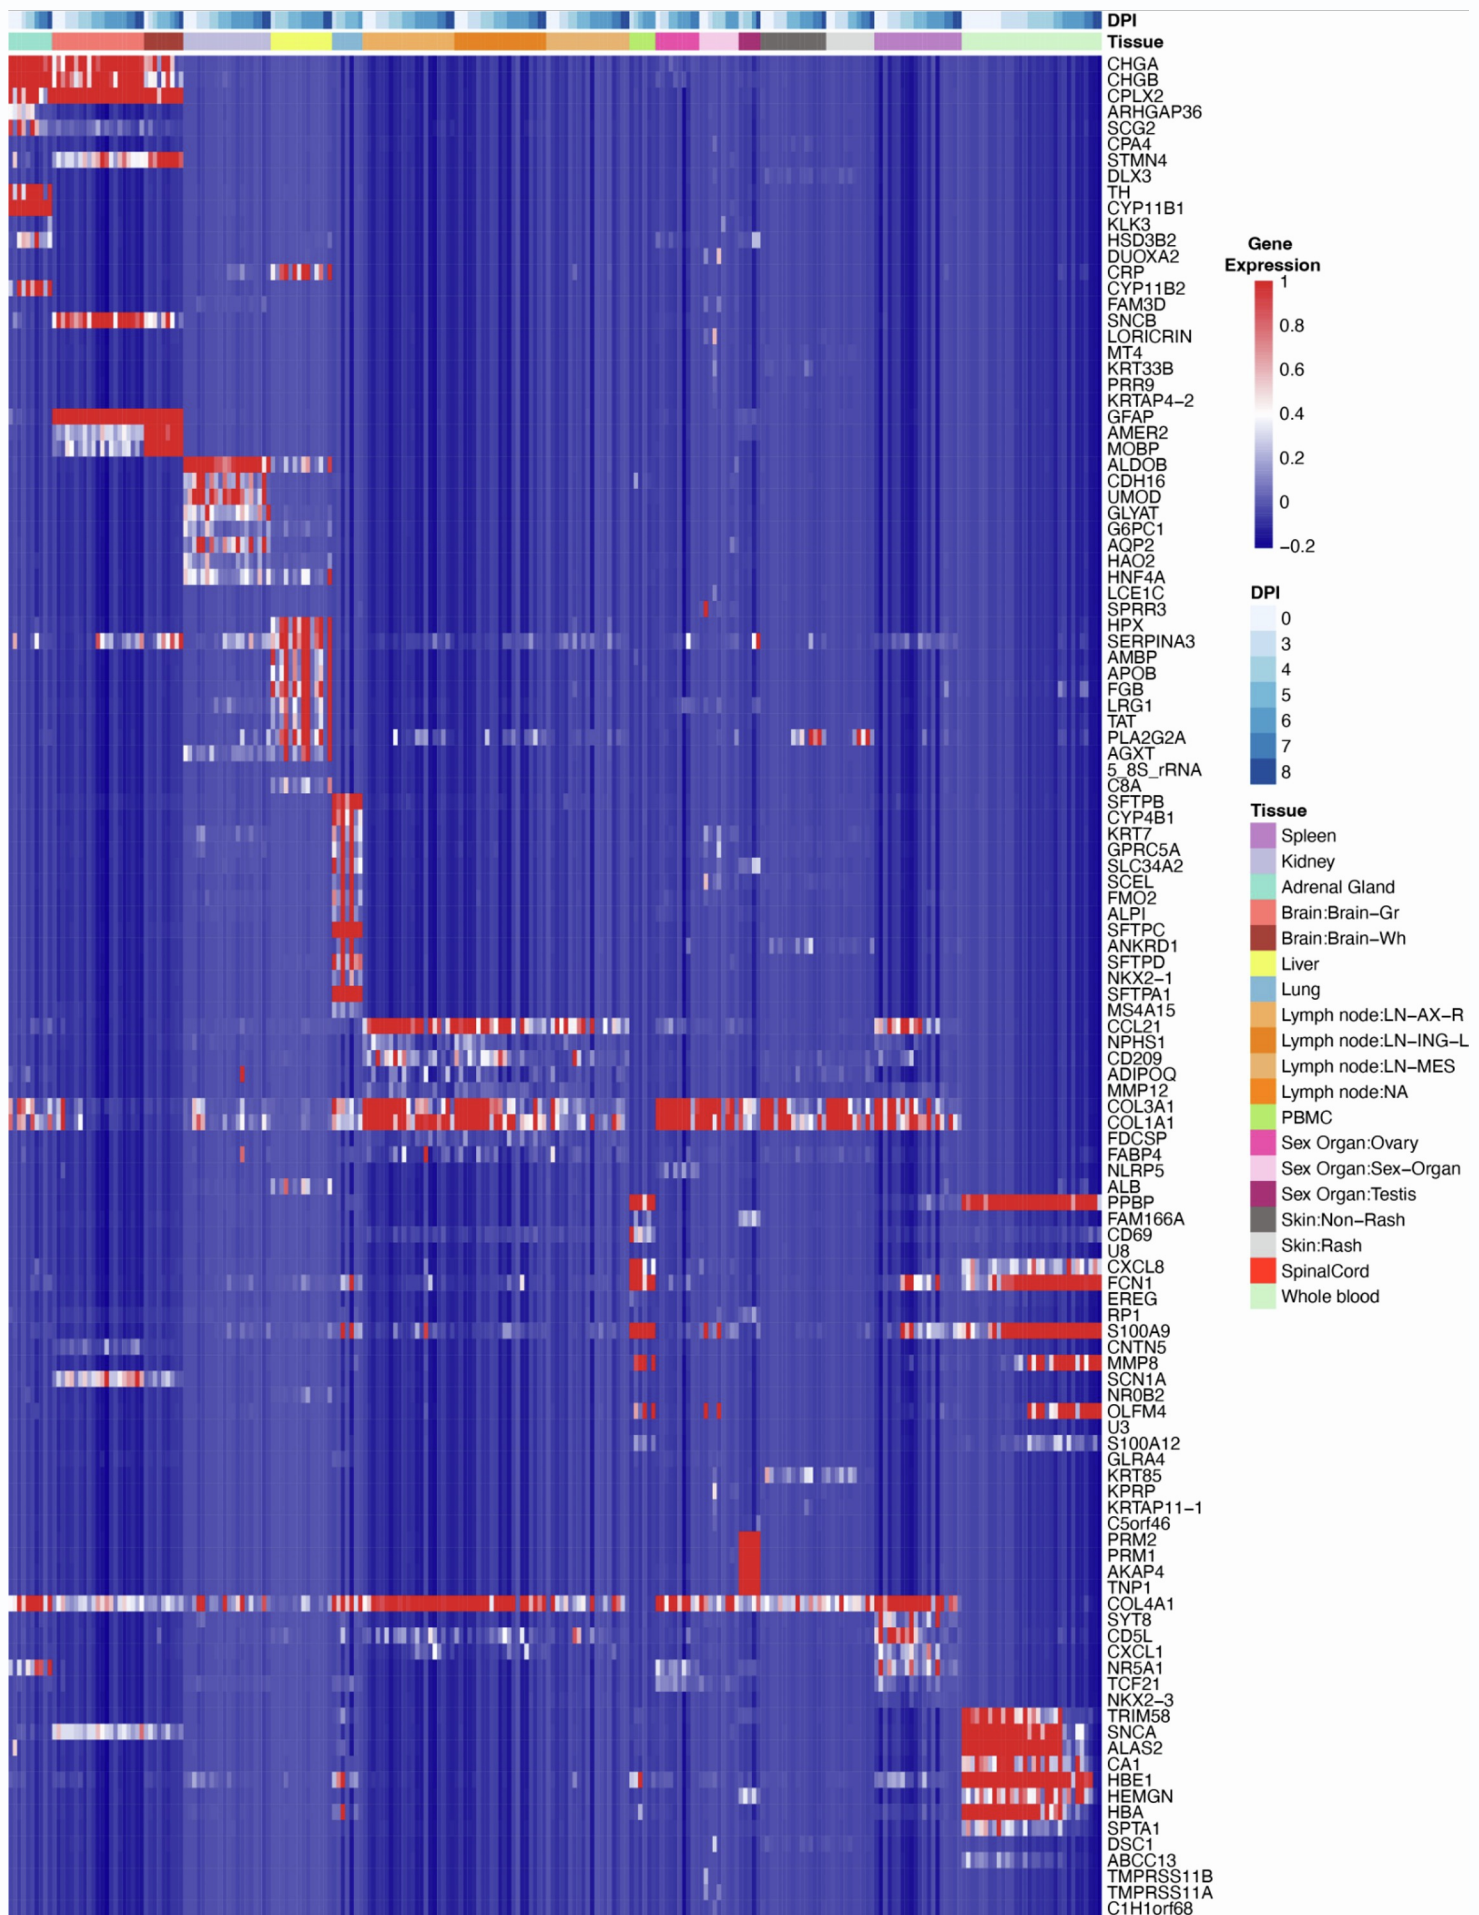

**Figure S7. Tissue specific marker genes, related to figure 3. Heatmap of top specific tissue marker genes across time points.**

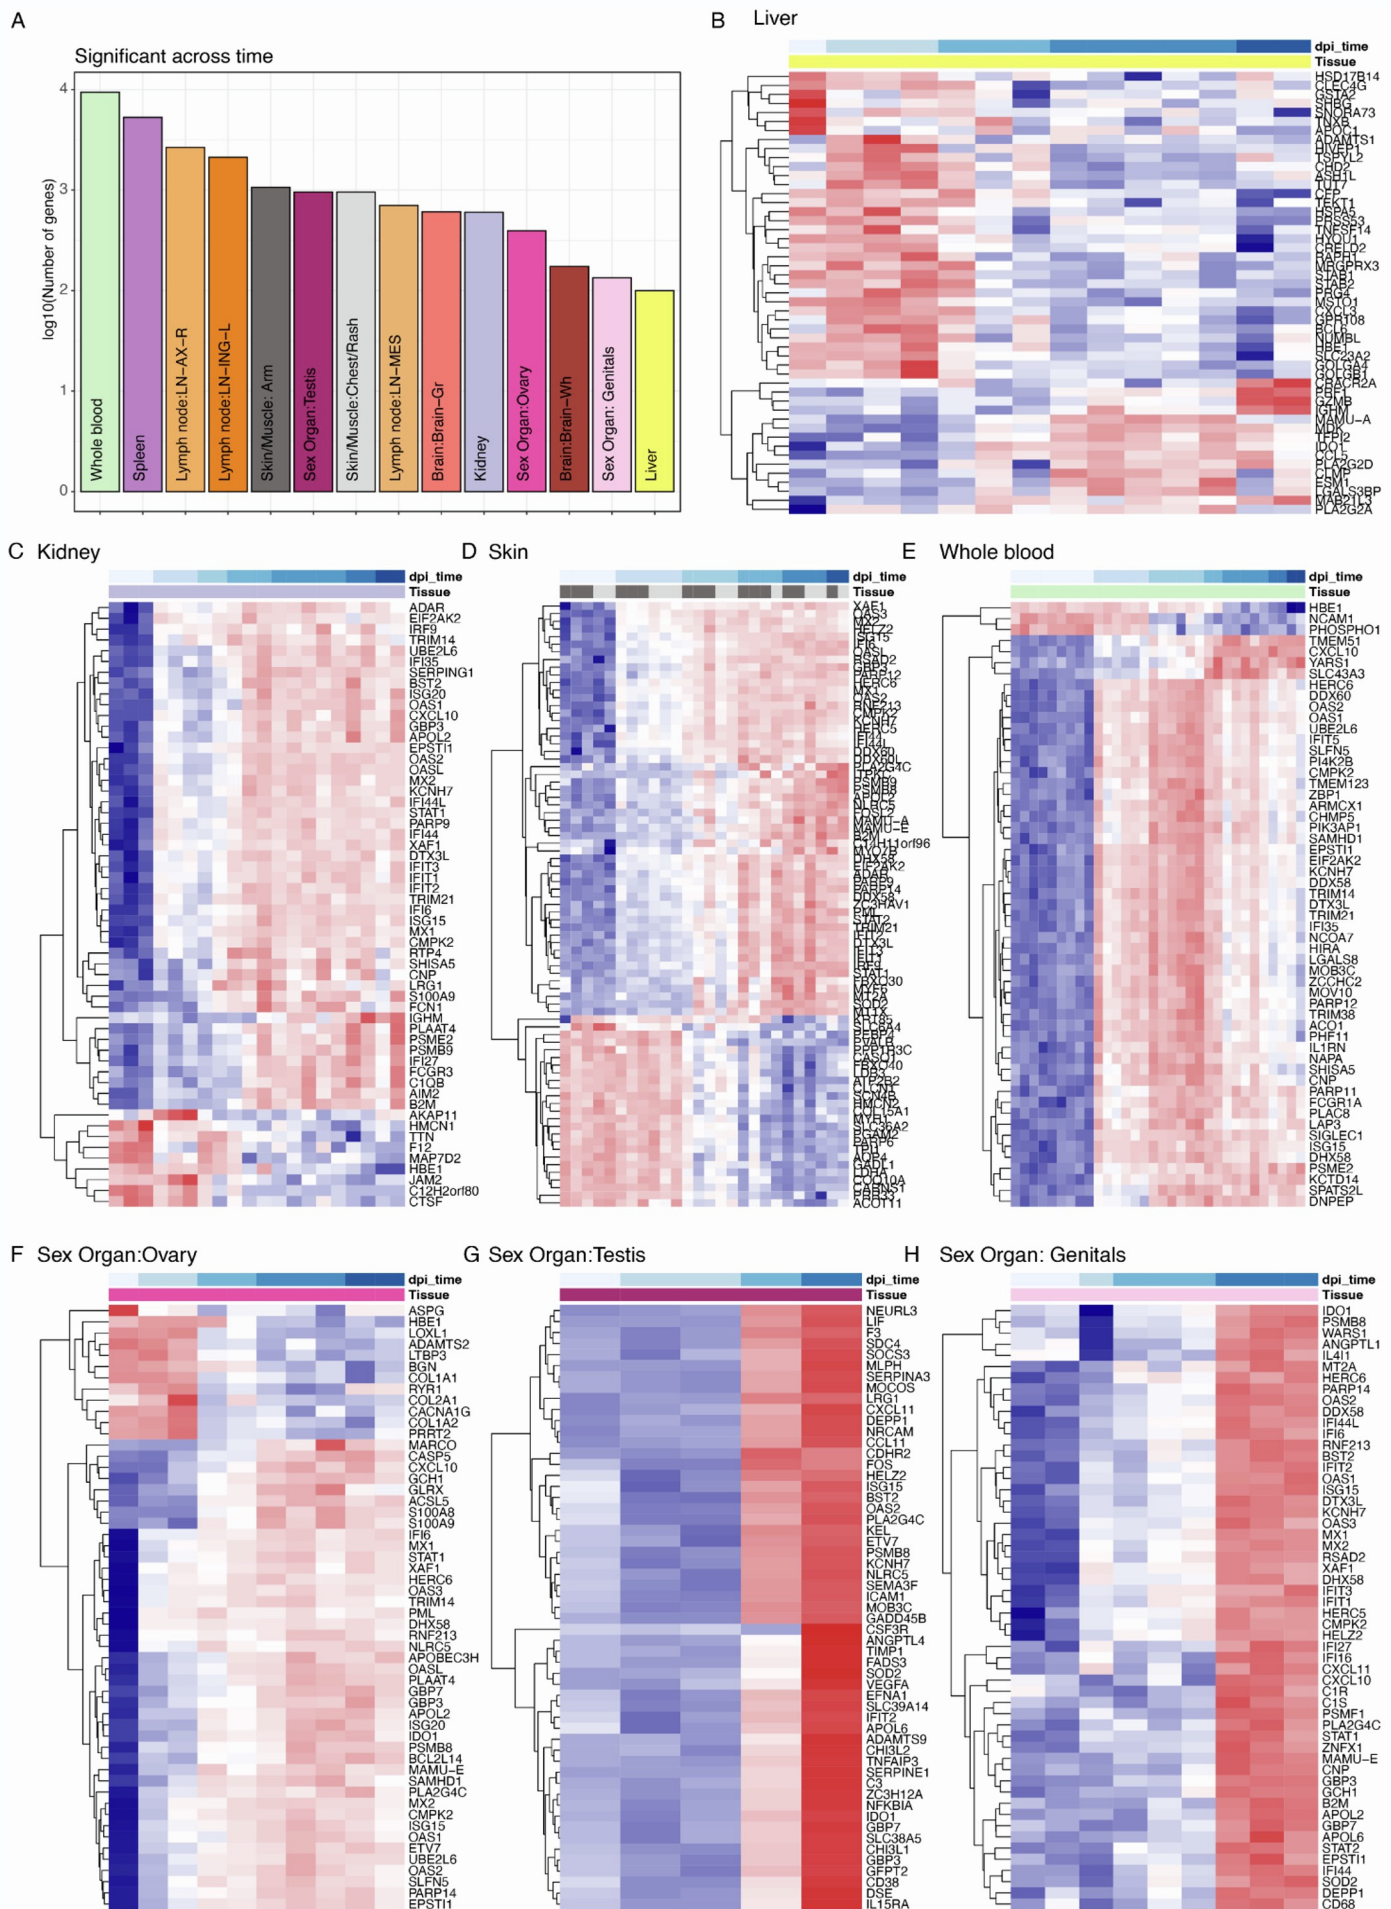

**Figure S8. Genes change across time, related to figure 3.** (A) Number of differentially expressed genes across time, tissues with more than 5 DE genes are shown in the plot. Heatmap of genes changing significantly across time for (B) Liver (C) Kidney (D) Skin (E) Whole Blood (F) Ovary (G) Testis and (H) Genitals



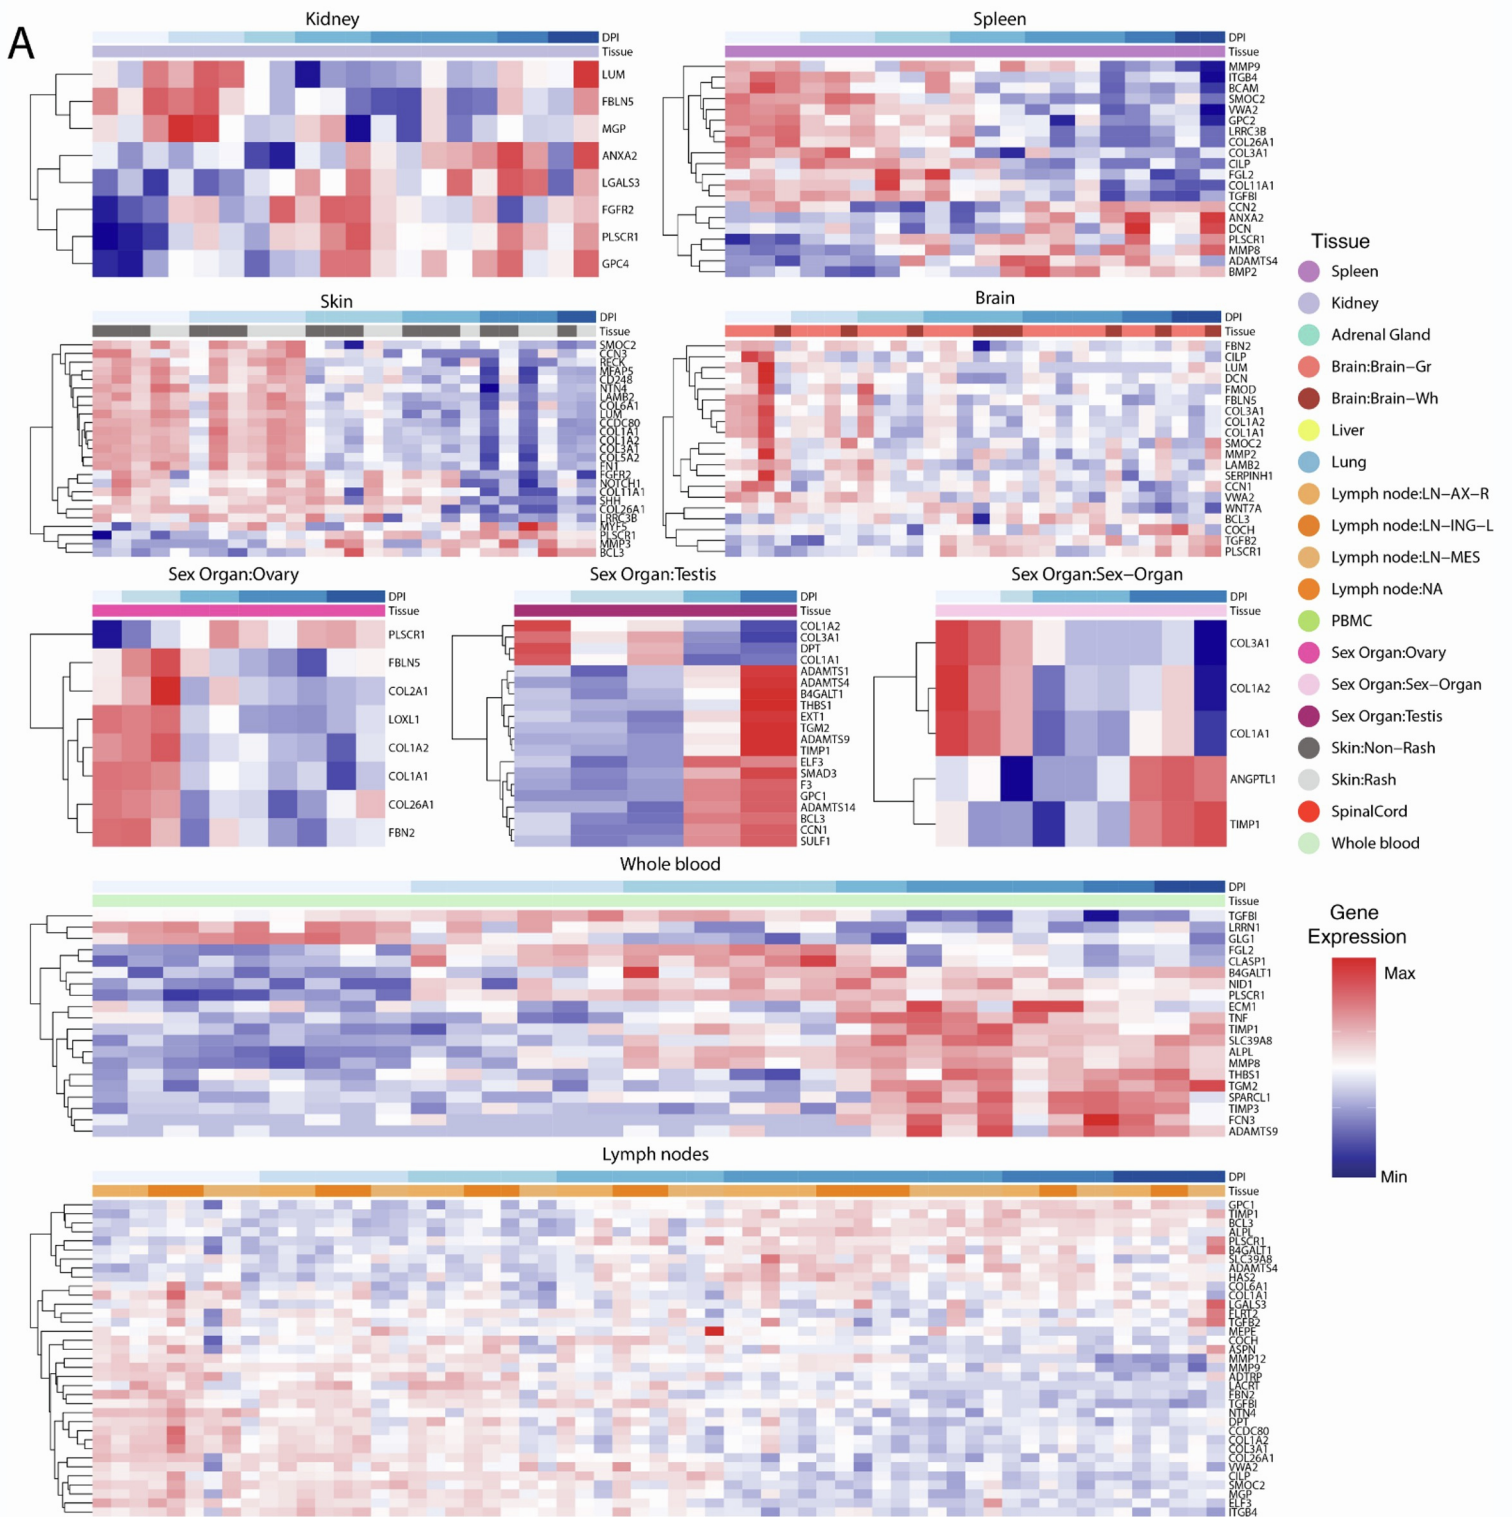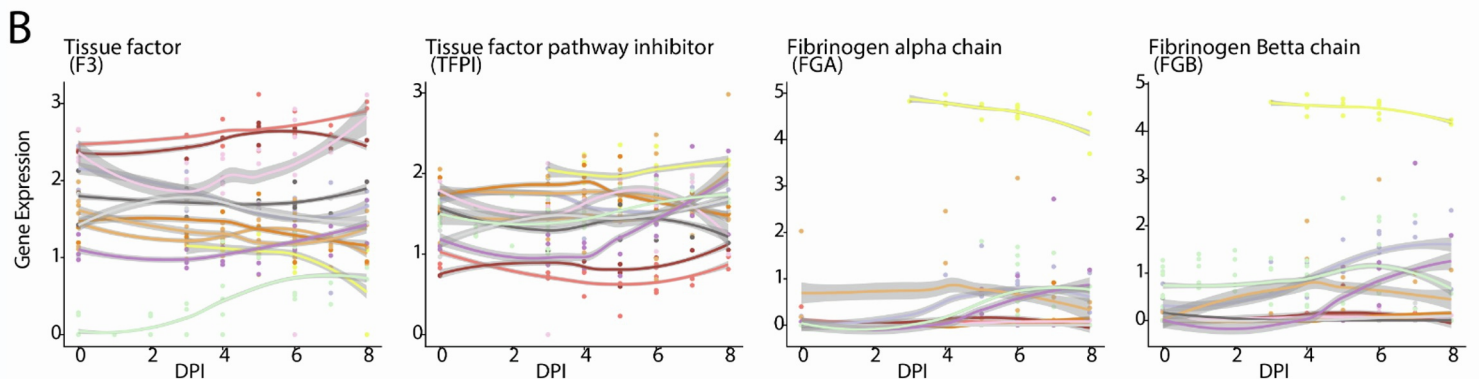

**Figure S9. ECM and Coagulation related genes change across time and tissues, related to figure 3.** (A) Heatmap of ECM genes that significantly change across time for each tissue (ImpulseDE2 Adjusted P-Value < 0.05). (B) Selected coagulation related genes expression.

**A.**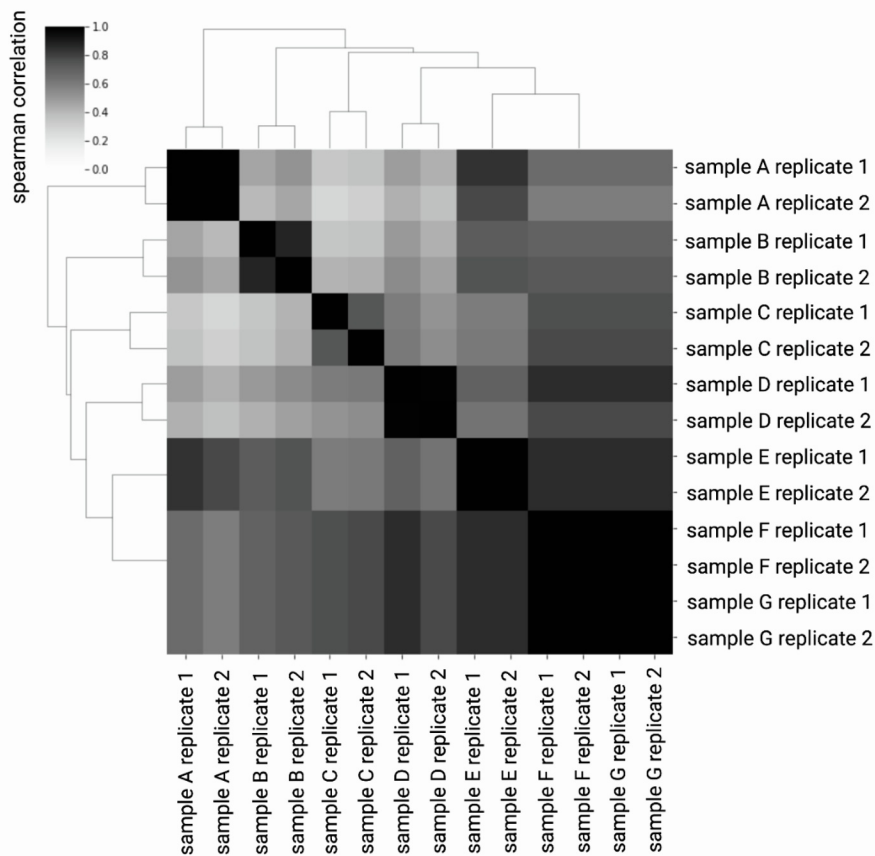**B.**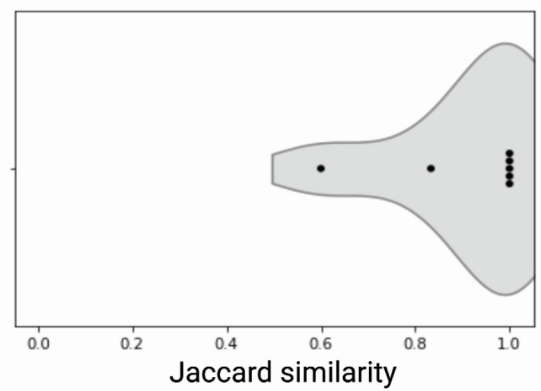**C.**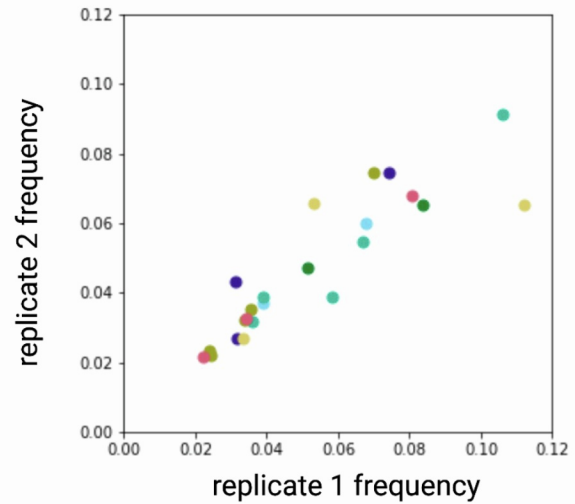**D.**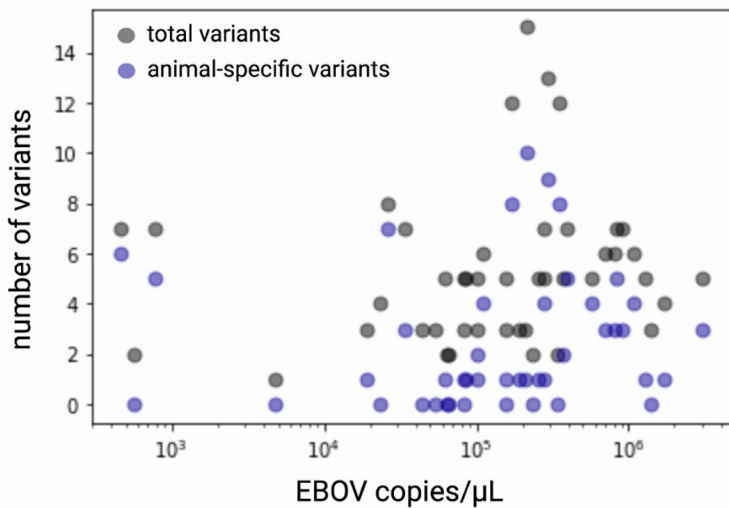**E.**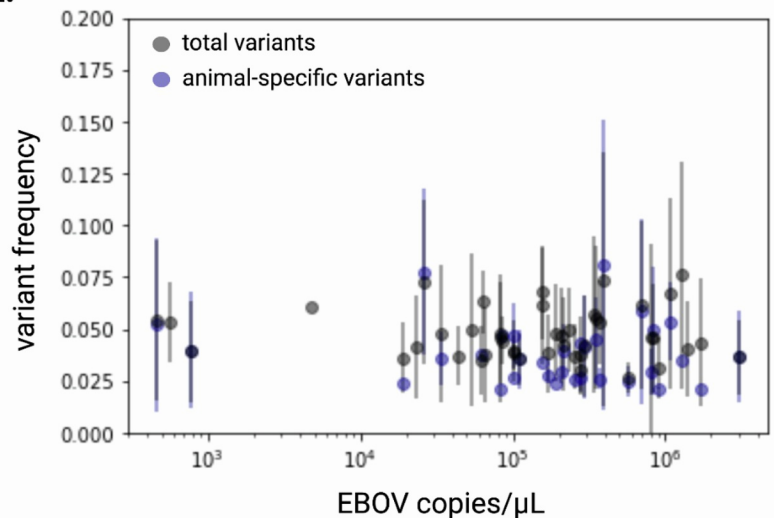

**Figure S10. Reliability of minor variant calling methodology, related to figure 4.** (A) Spearman correlation of variant profiles of 7 select samples with duplicate sequencing. (B) Violin plot of Jaccard similarities of variants identified in duplicate libraries from 7 samples. (C) For variants identified in two replicates, comparison of the frequency at which the variant was identified in each replicate. Each of the 7 samples is represented by a different color. (D) Total (black) and animal-specific (blue) variants identified versus viral load in each sample profiled. (E) Mean variant frequency versus viral load in each sample profiled. Error bars represent standard deviation of variant frequency.

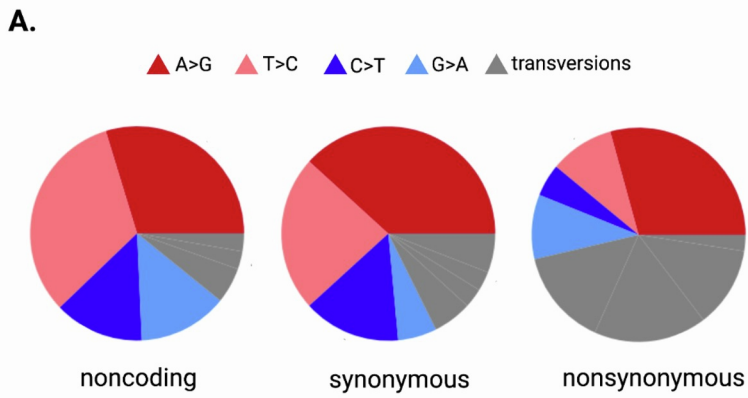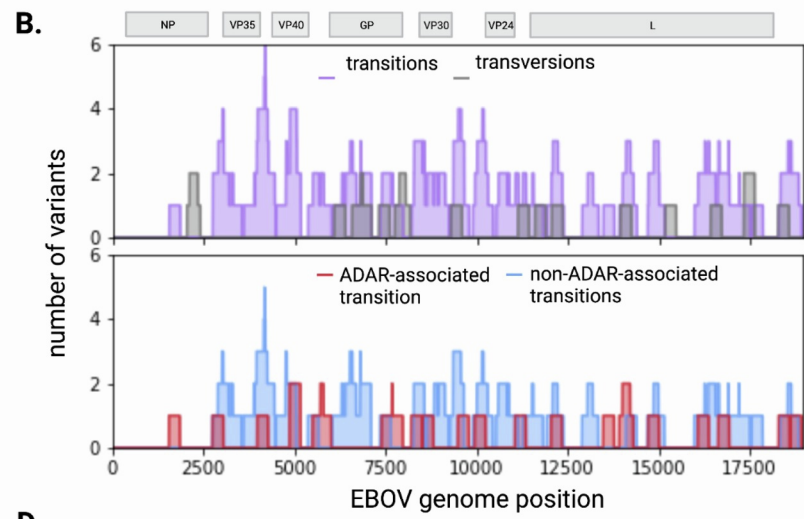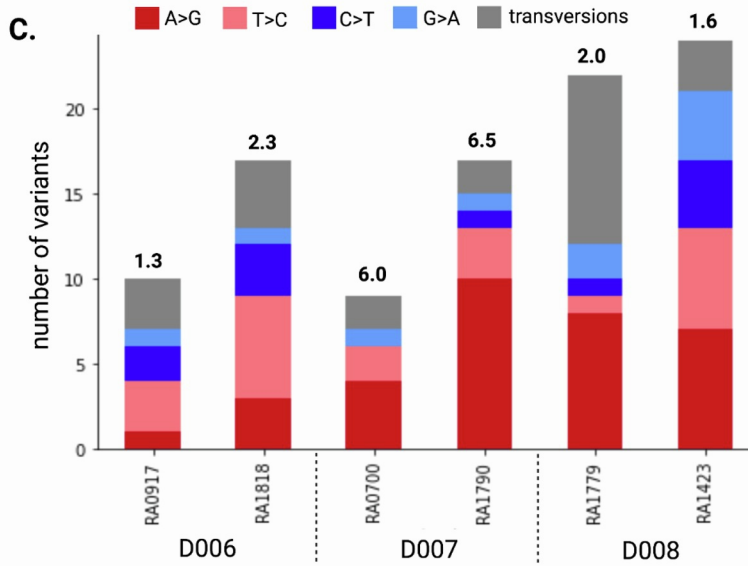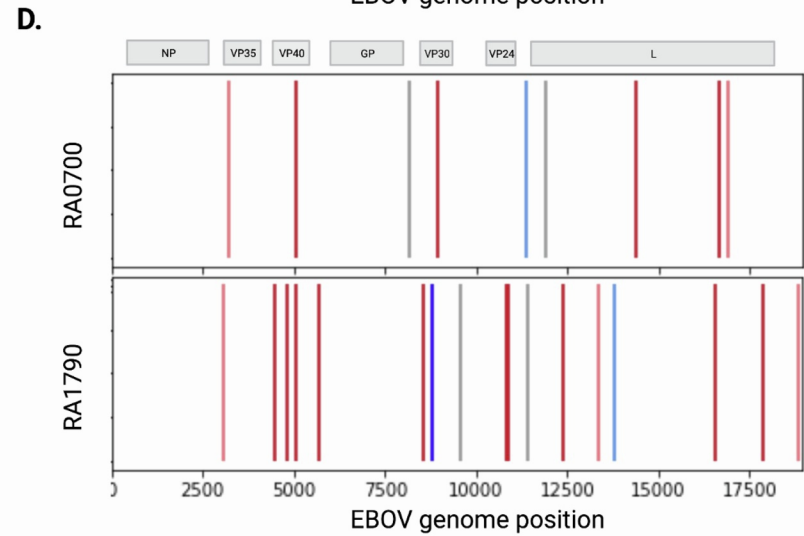

**Figure S11. Mutation types across the sample set, related to figure 4.** (A) Pie charts show relative amounts of each type of transition (labeled by color) and transversions (gray), separated by the mutation type. (B) Number of mutations that are transitions (purple) or transversions (gray) quantified by a 300 base pair sliding window across the EBOV genome. An EBOV gene map is above. (C) Stacked bar plots show the number of mutations that were each type of transition (labeled by color) and transversions (gray), separated by animal, ordered by DPI cohort. The bold number above shows the ratio of A-to-G and T-to-C mutations to C-to-T and G-to-A mutations, a marker of host RNA editing enzyme activity. (D) For two animals with the highest ratio of host RNA editing-associated mutations (RA0700 and RA1790), each mutation is represented by a vertical line along the EBOV genome on the x-axis. An EBOV gene map is above.

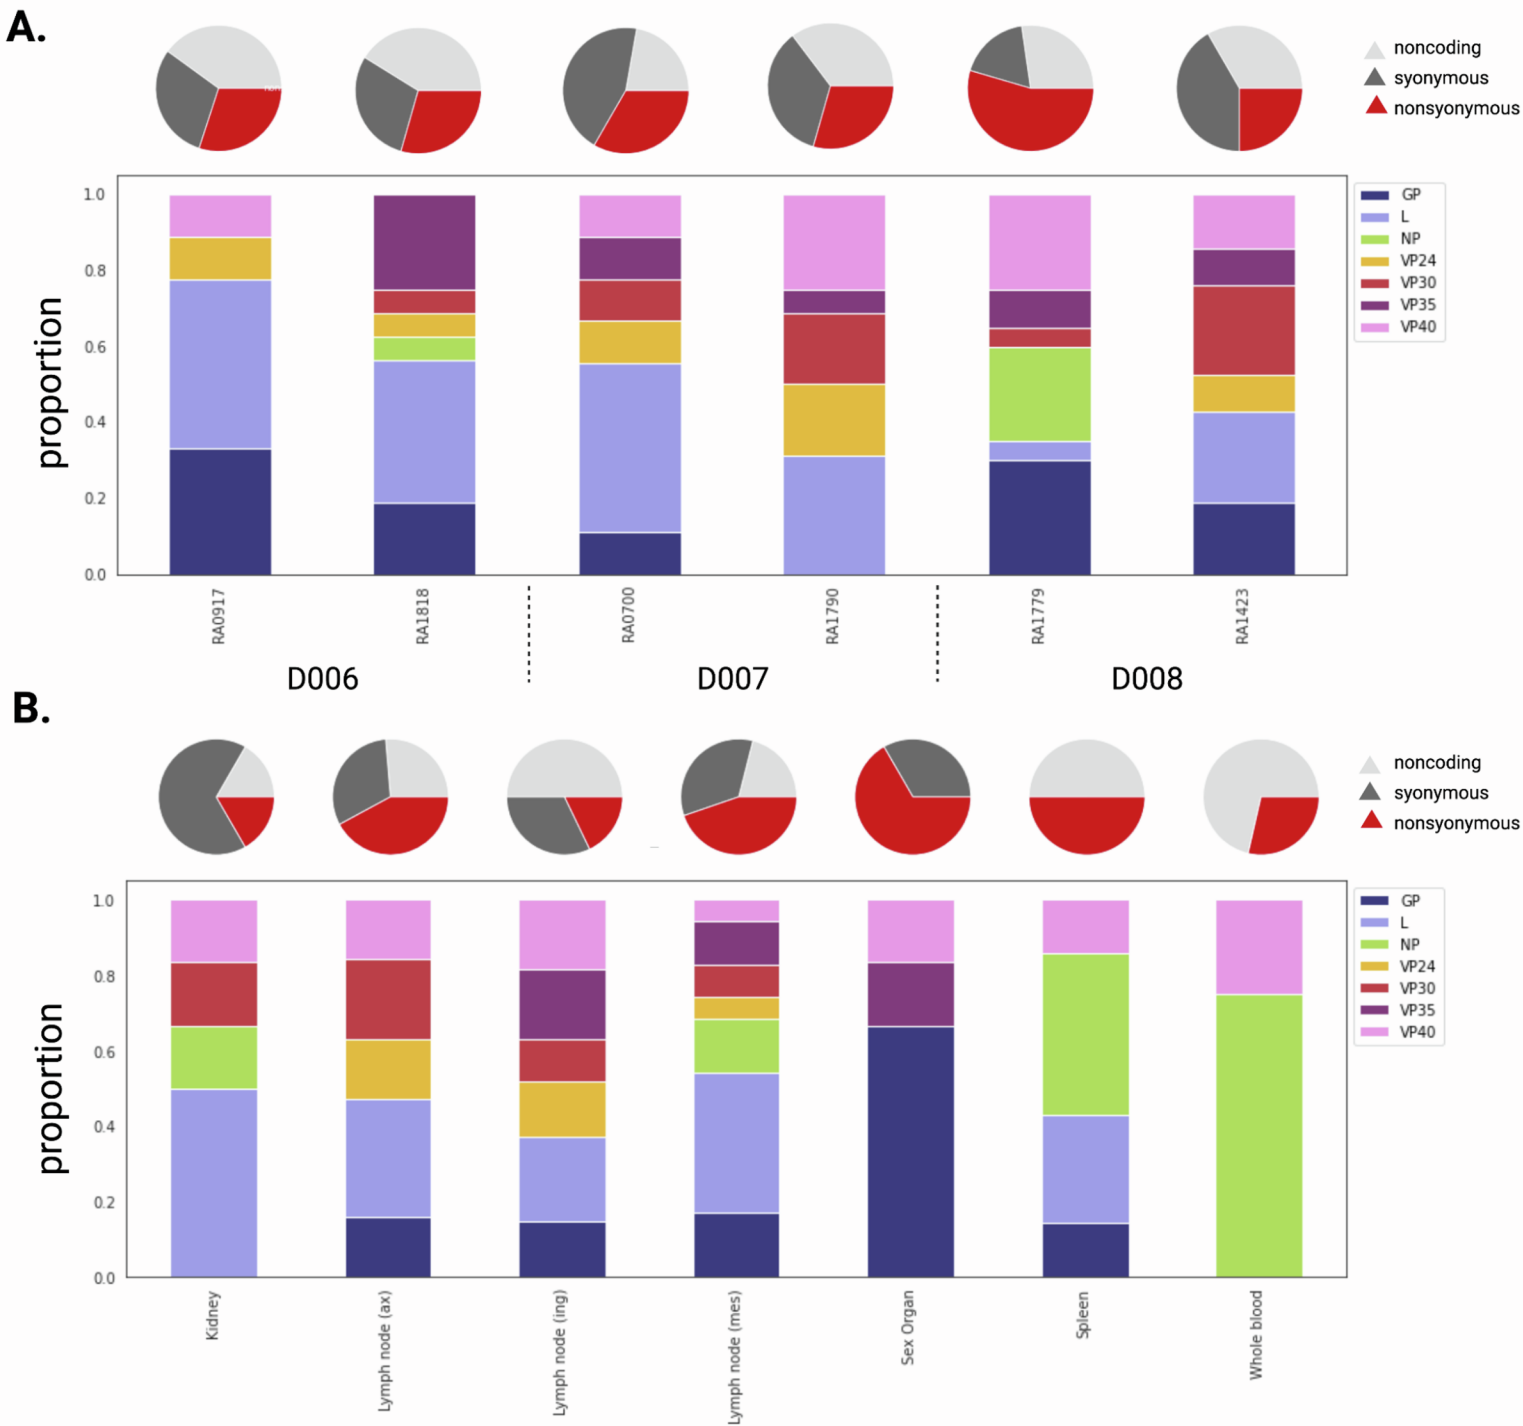

**Figure S12. Mutations across animals and tissues, related to figure 4.** (A) Proportion of nonsynonymous (red), synonymous (dark gray), and noncoding (light gray) variants across animals, ordered by cohort (top). Proportion of variants falling into each EBOV gene in each animal, ordered by cohort (bottom). (B) Proportion of nonsynonymous (red), synonymous (dark gray), and noncoding (light gray) variants within each tissue (top). Proportion of variants falling into each EBOV gene within each tissue (bottom).



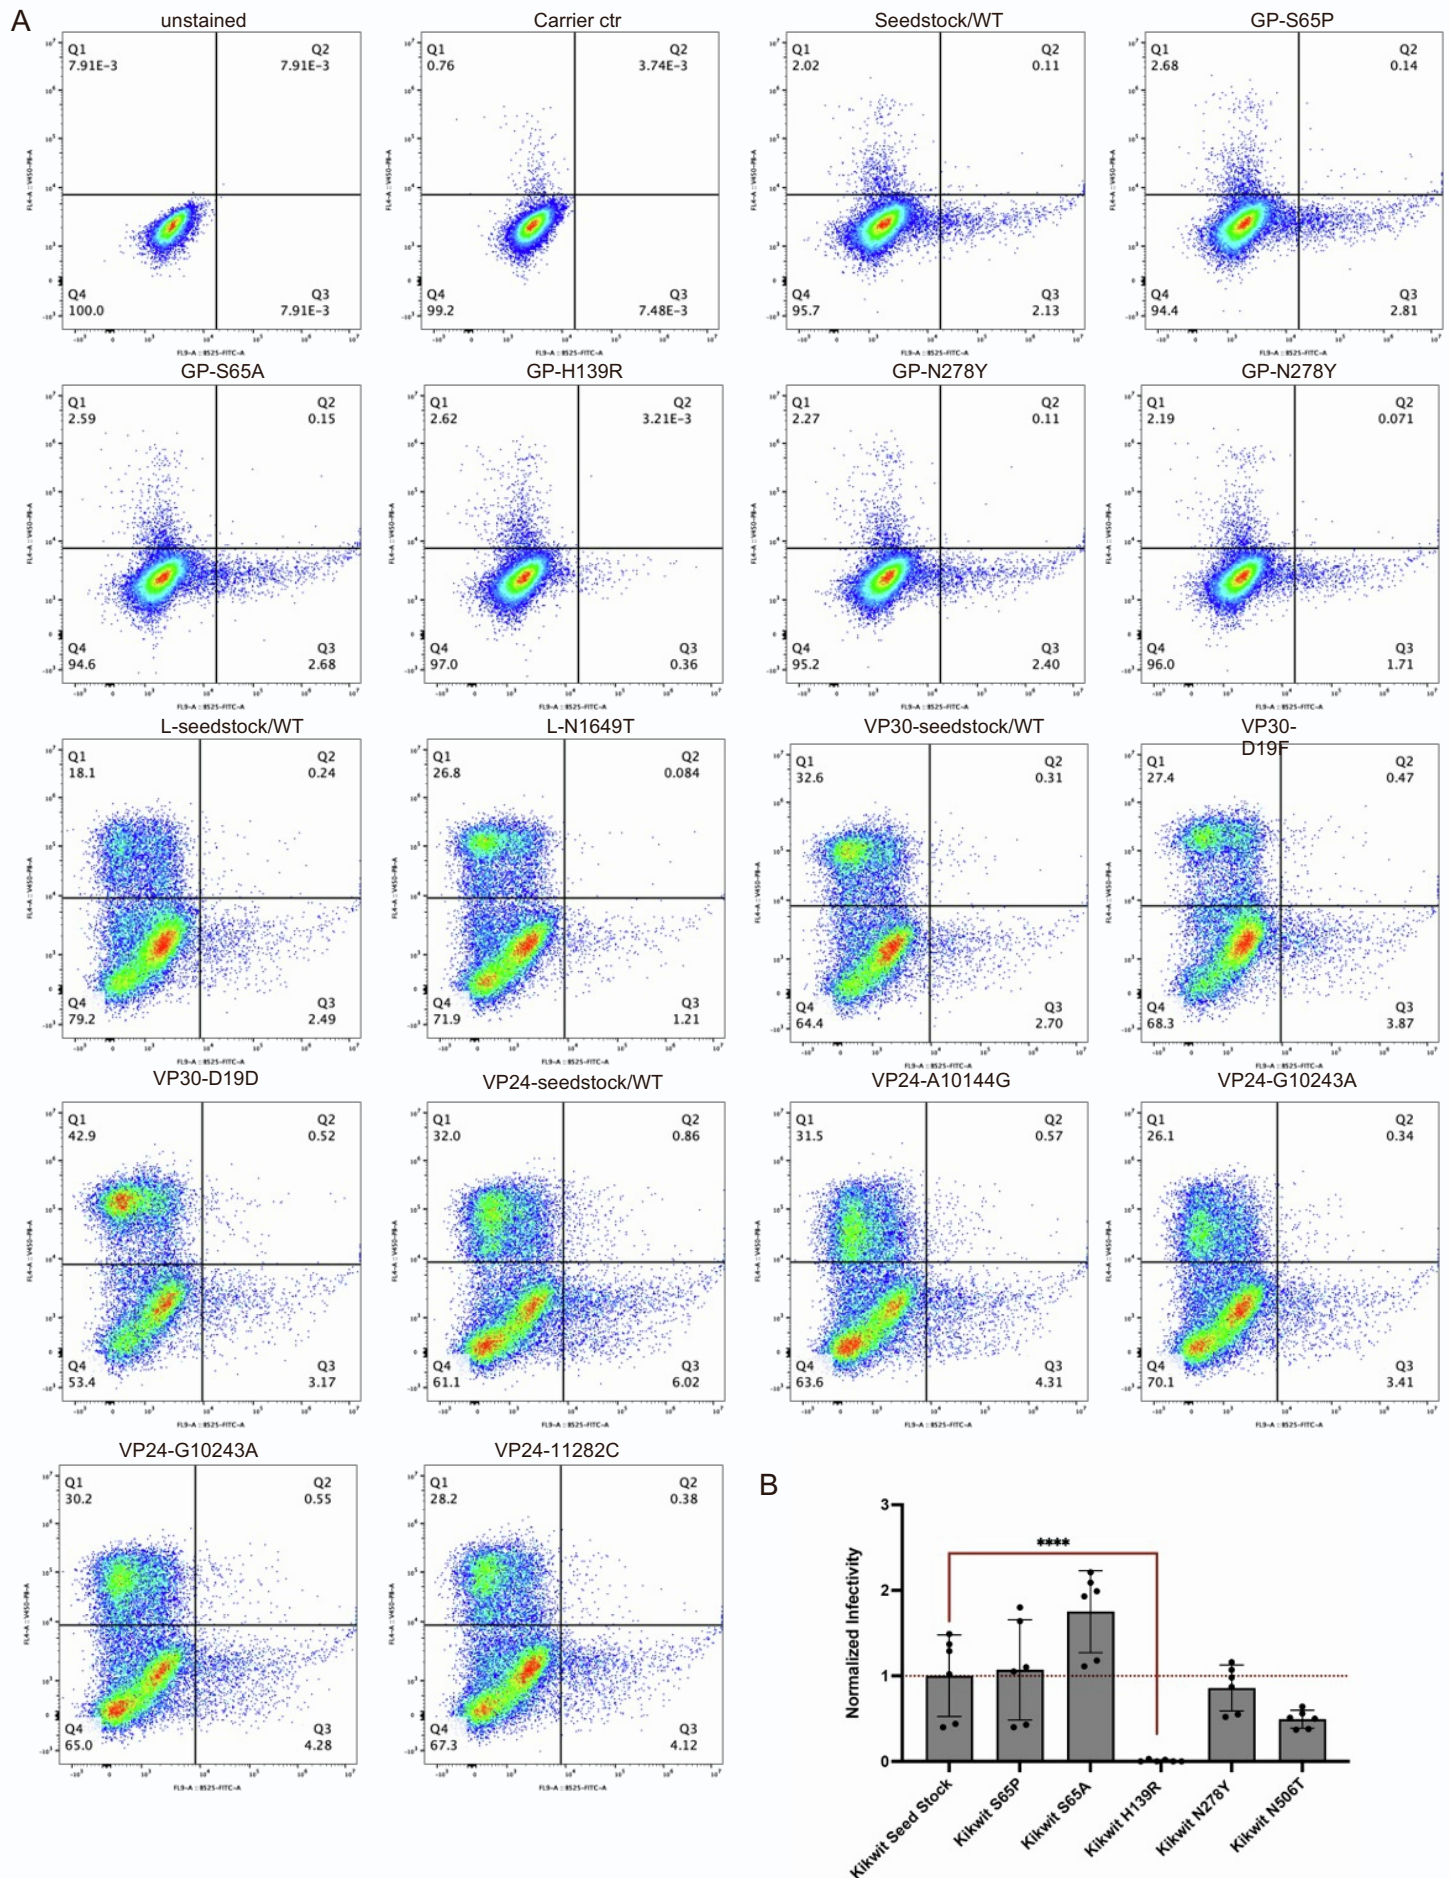

**Figure S13. Functional characterization of viral variants, related to figure 5** (A) Gating strategy for GFP+ cells EBOV minigenome expression in HEK293T cells, representative data for n=2 independent biological replicates. (B) Quantification of fold difference in mCherry mRNA expression in HEK293T cells transduced with lentiviral virions pseudotyped with EBOV GP bearing the viral seed stock sequence or variants. Error bars represents standard deviation.

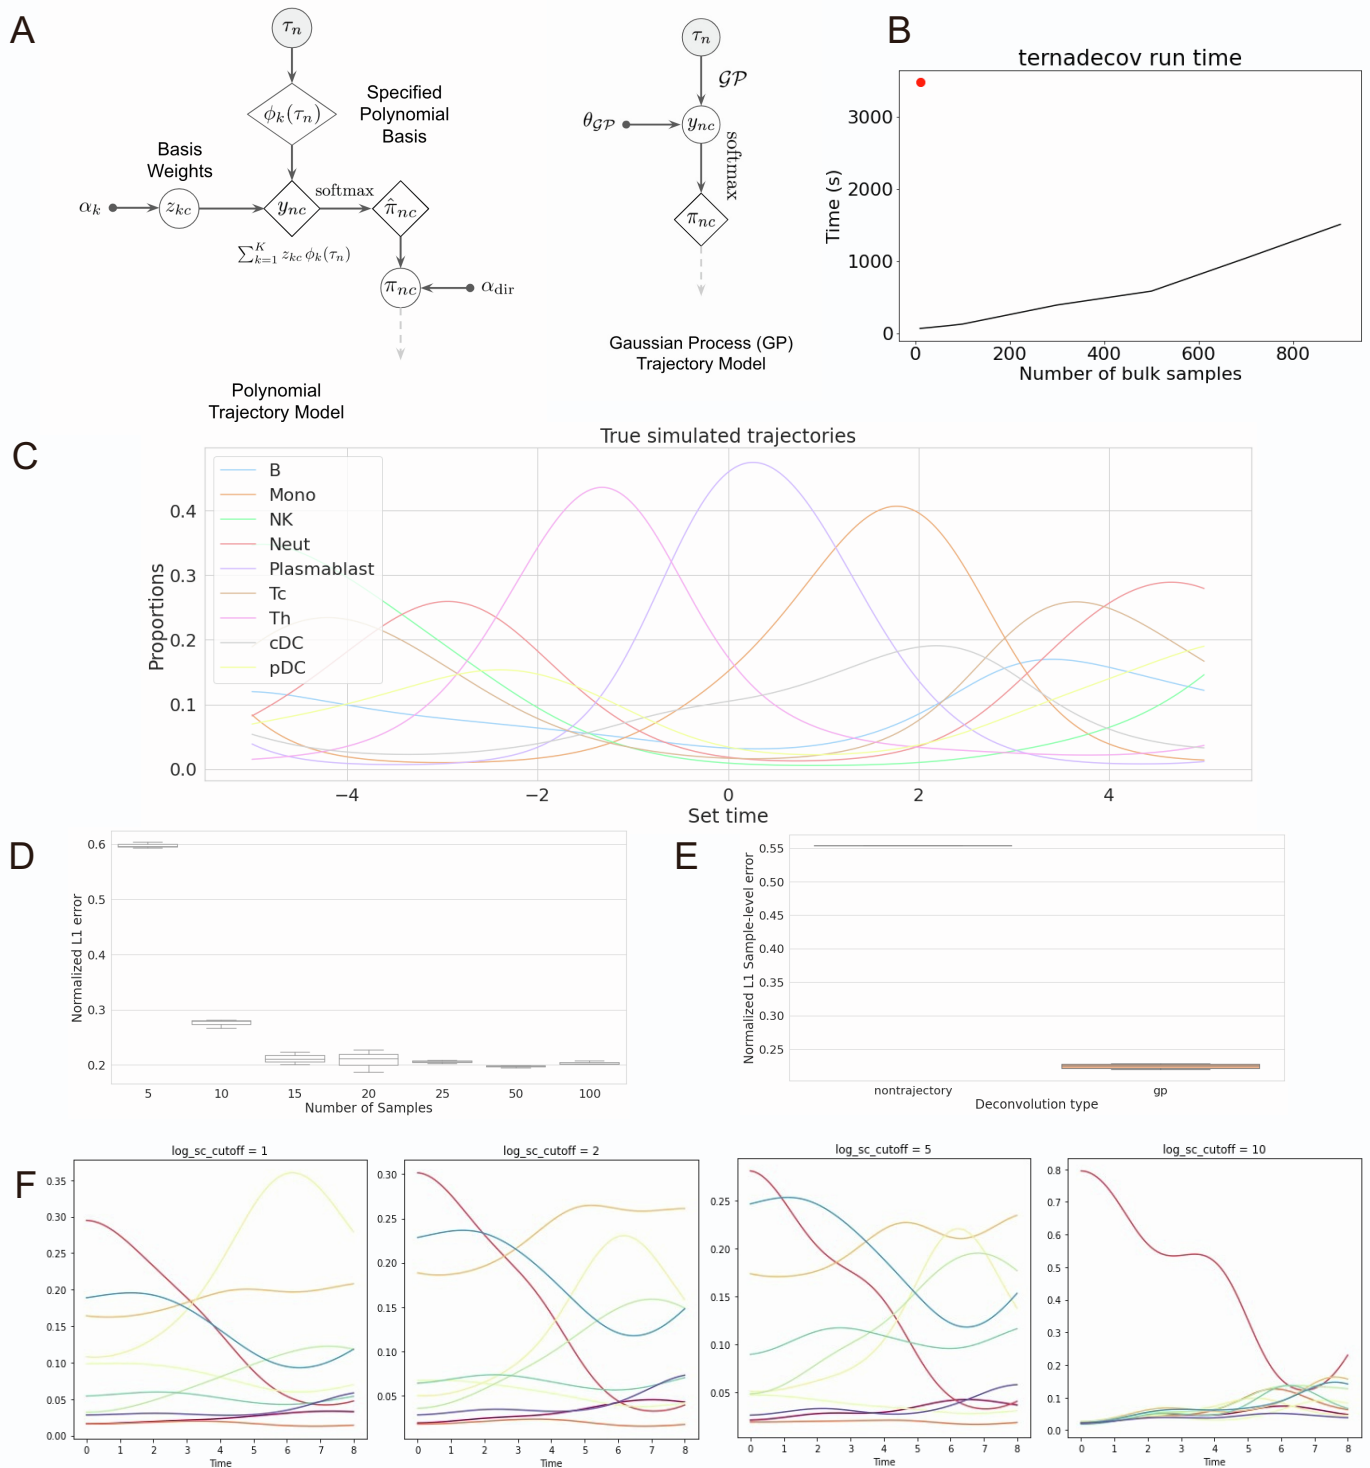

**Figure S14. Utilizing Time-series Covariate Information for Enhanced RNA-seq Deconvolution, related to STAR methods** (A) The parametric polynomial basis trajectory model (left), and the non-parametric Gaussian process trajectory model (right). The models are drop-in replacements as sub-models inside ternaDecov (see Figure 2D) (B) Execution time of ternaDecov (5,000 iterations, no GPU acceleration) for varying number of simulated samples using the GP trajectory module. The red point indicates the time required for deconvolution of the 10 samples from adrenal glands using MuSiC, shown for validation in the main text (C) Random simulated trajectory used for assessment of improvement in trajectory estimation as the number of sampled points increases (D) Normalized L1 trajectory error for trajectory estimation (at 1000 fixed points) using GP method from variable number of samples (3 replicates per point). Trajectory estimation improves as the number of samples increases (E) Normalized L1 sample-level error for the GP and non-trajectory (naive) model indicates that imposition of trajectory improves our ability to deconvolve the sample composition (F) Deconvolution results for adrenal tissues with increasing values of the log\_sc\_cutoff parameter (abundance cutoff for gene selection of the single-cell data) indicates robustness to parameter values.

**Data S1: Pentacistrionic Minigenome Assay plasmid sequences, related to STAR methods.**

1. EBOV/Kikwit 5MG

CGGACACACAAAAAGAAAGAAGAATTTTTAGGATCTTTTGTGTGCGAATAACTATGAGGAAGATTAATAATTTTCC  
TCTCATTGAAATTTATATCGGAATTTAAATTGAAATTGTTACTGTAATCACACCTGGTTTGTTCAGAGCCACATCA  
CAAAGATAGAGAACAACCTAGGTCTCTGAAGGGAGCAAGGGCATCAGTGTGCTCAGTTGAAAATCCCTTGTCAA  
CATCTAGGTCTTATCACATCACAAGTCCCACCTCAGACTCTGCAGGGTGATCCAACAACCTTAATAGAAACATTAT  
TGTTAAAGGACAGCATTAGTTTACAGTCAAACAAGCAAGATTGAGAATTAACCTTGGTTTTGAACTTGAATACTTA  
GAGGATTGGAGATTCAACAACCCTAAAGCTTGGGGTAAAACATTGGAATAGTTAAAAGACAAATTGCTCGGAAT  
CACAACATTCCGAGTATGGTGAGCAAGGGCGAGGAGCTGTTACCGGGGTGGTGCCCATCCTGGTCGAGCTGG  
ACGGCGACGTAAACGGCCACAAGTTCAGCGTGTCCGGCGAGGGCGAGGGCGATGCCACCTACGGCAAGCTGA  
CCCTGAAGTTCATCTGCACCACCGGCAAGCTGCCCGTGCCTGGCCACCCTCGTGACCACCTTGACCTACGG  
CGTGCAAGTTCGCCCCGTACCCCGACCACATGAAGCAGCACGACTTCTCAAGTCCGCCATGCCCGAAGGC  
TACGTCCAGGAGCGCACCATCTTCTTCAAGGACGACGGCAACTACAAGACCCGCGCCGAGGTGAAGTTCGAGG  
GCGACACCCTGGTGAACCGCATCGAGCTGAAGGGCATCGACTTCAAGGAGGACGGCAACATCCTGGGGCACAA  
GCTGGAGTACAACACTACAACAGCCACAAGGTCTATATCACCGCCGACAAGCAGAAGAACGGCATCAAGGTGAACT  
TCAAGACCCGCCACAACATCGAGGACGGCAGCGTGCAGCTCGCCGACCCTACCAGCAGAACACCCCCATCGG  
CGACGGCCCCGTGCTGCTGCCGACAACCACTACCTGAGCACCCAGTCCGCCCTGAGCAAAGACCCCAACGAG  
AAGCGCGATCACATGGTCTGCTGGAGTTCGTGACCGCCGCCGGGATCACTCTCGGCATGGACGAGCTGTACA  
AGTAAATGAGCATGGAACAATGGGATGATTCAACCGACAAAATAGTAACTTAGGTAGTCAAGGAACGAAAACAG  
GAAGAATTTTTGATGTCTAAGGTGTGAATTATTATCACAATAAAAGTGATTCTTATTTTTGAATTTAAAGCTAGCTT  
ATTATTACTAGCCGTTTTTCAAAGTCCAATTTGAGTCTTAATGCAAATAGGCGTTAAGCCACAGTTATAGCCATAA  
TTGTAACCTCAATCTAATAGCGATTTATCTAAATTAATACATTATGCTTTTATAACTTACCTACTAGCCTACC  
CAACATTTACACGATCATTTTATAATTAAGAAAAAACTAATGATGAAGATTAACCTTACATCATCCTTACGCTCAAT  
TGAATTTCTAGCACTCGAAGCTTATTGTCCTCAATGTAAGAAAGCTGGTCTAACAAGATGGTCTTCACACTC  
GAAGATTTGTTGGGGACTGGCGACAGCCGGCTACAACCTGGACCAAGTCTTGAACAGGGAGGTGTGT  
CCAGTTTGTTCAGAATCTCGGGGTGTCGGTAACTCCGATCCAAAGGATTGTCCTGAGCGGTGAAAATGGGCTG  
AAGATCGACATCCATGTCATCATCCCGTATGAAGGTCTGAGCGGCGACCAAATGGGCCAGATCGAAAAAATTTTT  
AAGGTGGTGTACCCTGTGGATGATCATCACTTTAAGGTGATCCTGCACTATGGCACACTGGTAATCGACGGGGT  
TACGCCGAACATGATCGACTATTTCCGACGGCCGTATGAAGGCATCGCCGTGTTCCGACGGCAAAAAGATCACTG  
TAACAGGGACCCTGTGGAACGGCAACAAAATTATCGACGAGCGCCTGATCAACCCCGACGGCTCCCTGCTGTTT  
CGAGTAACCATCAACGGAGTGACCGGCTGGCGGCTGTGCGAACGCATTCTGGCGTAAGCCATCTTCTTCCCT  
CCGAAAGAGGCGACTAATAGCAGAGGCTTCAACTGCTGAACTATAGGGTACGTTACATTAATGATACACTTGTGA  
GTATCAGCCCTGGATAATATAAGTCAATTAACGACCAAGATAAAAATTGTTCTTATCTCGCTAGCAGCTTAAAATA  
TGAATGTAATAGGAGCTATATCTCTGACAGTATTATAATCAATCGTTATTAAGTAACCCAAACCAAAAAGTGATGAA  
GATTAAGAAAAACCTACCTCGACTGAGAGAGTGTTTTTTCAATTAACCTTCACTTGTAAACGTTGAGCAAAATTGT  
TAAAAATATGAGGCGGGTTATATTACCTACTGCTCCTCCTGAATATATGGAGGCCATATACCCTGTCAGGTCAAA  
TTCAACAATTGCTAGAGGTGGCAACAGCAATACAGGCTTCCCTGACACCGGAGTCAGTCAATGGGGACACTCCAT  
CGAATCCACTCAGGCAATTGCCGATGACACCATCGACCATGCCAGCCACACACCAGGCAGTGTGTCATCAGCA  
TTCATCCTTGAAGCTATGGTGAATGTCATATCGGGCCCCAAAGTGCTAATGAAGCAAATTTCAATTTGGCTTCTT  
CTAGGTGTCGCTGATCAAAGACCTACAGCTTTGACTCAACAACGGCCGCCATCATGCTTGTCTCATATACTATC  
ACCCATTTCCGCAAGGCAACCAATCCACTTGTGAGAGTCAATCGGCTGGGTCTGGAATCCCGGATCACCCCT  
CAGGCTCCTGCGAATTGAAACCAGGCCTTCTCCAGGAGTTCGTTCTTCCGCCAGTCCAACCTACCCAGTATT  
TCACCTTTGATTTGACAGCACTCAAACCTGATCACCCAACCACTGCCTGCTGCAACATGGACCGATGACACTCCAA  
CAGGATCAAATGGAGCGTTGCGCCAGGGATTTTCAATTCATCCAAAACCTTCGCCCATTTTACCCAACAAGA  
GTGGGAAGAAGGGGAATAGTCCGATCTAACATCTCCGGAGAAAATCCAAGCAATAATGACTTCACTCCAGGAC  
TTAAGATCGTTCCAATTGATCCAACCAAAAATATCATGGGAATCGAAGTGCCAGAACTCTGGTCCACAAGCTG  
ACCGGTAAGAAGGTGACTTCTAAAAATGGACAACCAATCATCCCTGTTCTTTTGCCAAAGTACATTGGTTTGGAC  
CCGGTGGCTCCAGGAGACCTCACCATGGTAATCACACAGGATTGTGACACGTGTCATTCTCCTGCGAGTCTTCC  
AGCTGTGATTGAGAAGTAATTGCAATAATTGACTCAGATCCAGTTTTACAGAATCTTCTCAGGGATAGTGATAACA  
TCTATTTAGTAATCCGTCCATTAGAGGAGATACTTTAATTGATCAATATACTAAAGGTGCTTTACACCATTGTCTT  
TTTCTCTCTAAATGTAGAACTTAACAAAAGACTCATAATATACTTGTTTTTAAAAGATTGATTGATGAAAGATCA



TAACTAATAACATTACAAATAATCCTACTATAATCAATACGGTGATCCAAATGTTAATCTTTCTCATTGCAAATACT  
CTTTGCCCTTATCCTCAAATTGCCTACATGCTTACATCTGAGGATAGCCAGTGTGACTTGGATTGGAGATGTGGA  
GAAAAAATCGGGACCCATTTCTAGGTTGTTACCATCCAAGTACAGACATTGCCCTTCTAATTAAGAAAAAATCG  
GCGATGAAGATTAAGCCGACAGTGAGCGTAATCTTCATCTCTTAGATTATTTGTCTCCAGAGTAGGGATCGT  
CAGGTCCTTTTCAATCGTATAACCAAAAATAAACTTCACTAGAAGGATATTGTGGGGCAACAACACAATGGGTGTT  
ACAGGAATATTGCAGTTACCTCGTGATCGATTCAAGAGGACATCATTCTTTCTTTGGTAATTATCCTTTTCCAAA  
GAACATTTTCCATCCCCTTGGAGTCATCCACAATAGCACATTACAGTTAGTGATGTCGACAAACTGGTTTGGC  
GTGACAAACTGTCATCCACAAATCAATTGAGATCAGTTGGACTGAATCTCGAAGGGAATGGAGTGGCAACTGAC  
GTGCCATCTGCAACTAAAAGATGGGGCTTCAGGTCCGGTGTCCCACCAAAGGTGGTCAATTATGAAGCTGGTGA  
ATGGGCTGAAAACCTGCTACAATCTTGAATCAAAAAACCTGACGGGAGTGAGTGTCTACCAGCAGCGCCAGACG  
GGATTCGGGGCTTCCCCGGTGCCTGATGTGCACAAAAGTATCAGGAACGGGACCGTGTGCCGGAGACTTTGC  
CTTCCACAAAGAGGGTGCTTTCTTCTGTATGACCGACTTGCTTCCACAGTTATCTACCGAGGAACGACTTTGCG  
TGAAGGTGTCGTTGCATTTCTGATACTGCCCCAAGCTAAGAAGGACTTCTCAGCTCACACCCCTTGAGAGAGC  
CGGTCAATGCAACGGAGGACCCGTCTAGTGGCTACTATTCTACCACAATTAGATATCAAGCTACCGGTTTTGGAA  
CCAATGAGACAGAGTATTTGTTGAGGTTGACAATTTGACCTACGTCCAATTGAATCAAGATTCACACCACAGT  
TTCTGCTCCAGCTGAATGAGACAATATATACAAGTGGGAAAAGGAGCAATACCACGGGAAAACCTAATTTGGAAGG  
TCAACCCCGAAAATTGATACAACAATCGGGGAGTGGGCCTTCTGGGAAAACCTAAAAAAACCTCACTAGAAAAATTC  
GCAGTGAAGAGTTGTCTTTACAGCTGTATCAAACAGAGCCAAAAACATCAGTGGTCAGAGTCCGGCGCGAACT  
TCTTCCGACCCAGGGACCAACACAACAACCTGAAGACCACAAAATCATGGCTTCAGAAAATTCCTCTGCAATGGTT  
CAAGTGCACAGTCAAGGAAGGGAAGCTGCAGTGTGCGATCTGACAACCCCTGCCACAATCTCCACGAGTCTCA  
ACCCCCACAACCAACCAGGTCCGGACAACAGCACCCACAATACACCCGTGTATAAACTTGACATCTCTGAGG  
CAACTCAAGTTGAACAACATCACCGCAGAACAGACAACGACAGCACAGCCTCCGACACTCCCCCGCCACGAC  
CGCAGCCGGACCCCTAAAAGCAGAGAACACCAACACGAGCAAGGGTACCGACCTCCTGGACCCCGCCACCACA  
ACAAGTCCCAAAACCACAGCGAGACCGTGGCAACAACAACACTCATCACCAGATACCGGAGAAGAGAGTG  
CCAGCAGCGGGAAGCTAGGCTTAATTACCAATACTATTGCTGGAGTCGAGGACTGATCACAGGCGGGAGGAG  
AGCTCGAAGAGAAGCAATTGTCAATGCTCAACCCAAATGCAACCCTAATTTACATTACTGGACTACTCAGGATGA  
AGGTGCTGCAATCGGACTGGCCTGGATACCATATTTCCGGGCCAGCAGCCGAGGGAATTTACATAGAGGGGCTG  
ATGCACAATCAAGATGGTTAATCTGTGGGTTGAGACAGCTGGCCAACGAGACGACTCAAGCTCTTCAACTGTT  
CTGAGAGCCACAACCGAGCTACGCACCTTTTCAATCCTCAACCGTAAGGCAATTGATTTCTTGCTGCAGCGATG  
GGGCGGCACATGCCACATTTTGGGACCGGACTGCTGTATCGAACCATGATTGGACCAAGAACATAACAGACA  
AAATTGATCAGATTATTCATGATTTTGTGATAAAACCCCTCCGGACCAGGGGGACAATGACAATTGGTGGACAG  
GATGGAGACAATGGATACCGGCAGGTATTGGAGTTACAGGCGTTATAATTGCAGTTATCGCTTTATTCTGTATAT  
GCAAATTTGTCTTTTAGTAAGGCTGACTAAAACACTATATAACCTTCTACTTGATCACAATACTCCGTATACCTATT  
ATCATATATTTAATCAAGACGATATCCTTTAAGACTTATTCAGTACTATAATCACTCTCGTTTCAAATTAATAAGATG  
TGCATGATTGCCCTAATATATGAAGAGGTATGATACAACCCTAACAGTGACCAAAGAAAATCATAATCTCGTATCG  
CTCGTAATATAACCTGCCAAGCATACTCTTGCACAAAGTGATTCTTGTACACAAAATAATGTTTTACCCTACAGGA  
GGTAGCAACGATCCATCCCATCAAAAAATAAGTATTTTATGACTTACTAATGACCTCTTAAAATATTAAGAAAACT  
GACGGAACATAAATCTTTCTGCTTCAAGTTGTGGAGGAGGTGTTTGGTATTGGCTATTGTTATATTACAATCAAT  
AACAAGCTTGAAAAATATTGTTCTTGTTCAGAGGTAGATTGTGGCTGGAAATGCTAAACTAATGATGAAGATT  
AATGCGGAGGTCTGATAAGAATAAACCTTATTATTCAGATTAGGCCCAAGAGGCATTCTTCATCTCCTTTTAGCA  
AAGTACTATTTACGGGTAGTCCAATTAGTGACACGTCTCTTAGCTGTATATCAGTCGCCCTGAGATACGCCACA  
AAAGTGTCTAAGCTAAATTGGTCTGTACACATCTCATAATTGTATTAGGGACAATAATATCTAATTGAACCTTAG  
CCGTTTAAAATTTAGTGCATAAATCTGGGCTAACTCCACCAGGTCAACTCCATTGGCTGAAAAGAAGCCTACCTA  
CAACGAACATCACTTTGAGCGCCCTCACATTTAAAAATAGGAACGTCGTTCCAACAATCGAGCGCAAGGTTTCA  
AGGTTGAACTGAGAGTGTCTAGACAACAAAGTATCGATCCTCCAGACACCAAGCAAGACCTGAGAAAAAACCAT  
GGCTAAAGCTACGGGACGATACAATCTAATATCGCCCAAAAAGGACCTGGAGAAAGGGGTTGTCTTAAGCGACC  
TCTGTAACCTTCTTAGTTAGCCAACTATTACAGGGTGGAAAGGTTTATTGGGCTGGTATTGAGTTTGTGTGACTCA  
CAAAGGAATGGCCCTATTGCAAAGACTGAAAACCTAATGACTTTGCCCTGCATGGTCAATGACAAGGAATCTCTT  
TCCTCATTTATTTCAAATCCGAATTCACAATTGAATCACCGCTGTGGGCATTGAGAGTCATCCTTGCAGCAGG  
GATACAAGACCAGCTGATTGACCACTTTGATTGAACCCCTTAGCAGGAGCCCTTGGTCTGATCTCTGATTGGCT  
GCTAACAACCAACACTAACCTTTCAACATGCGAACACAACGTTCAAGGAACAATTGAGCCTAAAAATGCTGTC  
GTTGATTGATCCAATATTCTCAAGTTTATTAACAAATTGGATGCTCTACATGTCGTAACCTACAACGGATTGTTG  
AGCAGTATTGAAATTGAACTCAAAATCATACAATCATCATAACTCGAATAACATGGGTTTTCTGGTGGAGCTCC  
AAGAACCCGACAAATCGGCAATGAACCGCAAGAAGCCTGGGCCGGCGAAATTTCCCTCCTTCATGAGTCCACA

CTGAAAGCATTACACAAGGATCCTCAACACGAATGCAAAGTTTGATTCTTGAATTTAATAGCTCTCTTGCTATCT  
AACTAAGATGGAATACTTCATATTGAGCTAACTCATATATGCTGACTCAATAGTTATCTTGACATCTCTGCTTTCAT  
AATCAGATATATAAGCATAATAAATAAATACGCATATTTCTTGATAATTTGTTAAACCACAGATAAATCCTCACTGT  
AAGCCAGCTTCCAAGTTGACACCCCTTACAAAAACCAGGACTCAGAATCCCTCAAATAAGAGATTCCAAGACAACA  
TCATAGAATTGCTTTATCATATGAATAAGCATTATATCACCAGAAATCTTATATACTAAATGGTTAATTGTAAGTAA  
CCCGCAGGTCACATGTGTTAGGTTTACAGATTTTATATATTACTAACTCTATACTCGTAATTAACATTAGATAAGT  
AGATTAAGAAAAAATTACCGTGCATAGTATCCTGATACTTGCAAAGGTTGGTTATCAACATACAGATTATAAAAA  
ACTCATAAATTGCTCTCATACATCATATTGATCTGATTTCAATAAACAACCTATTTAAATAACGAAAGGAGTCCCTAT  
ATTATACACTATATTTAGCCTCTCTCCCTGCGTGATAATCAAAAAATTCACAATGCAGCATGTGTGACATATTAATG  
CCGCAATGAATTTAACGCAACATAATAAACTCTGCACTCTTTATAATTAAGCTTTAACGAAAGGCTGGGCTCATA  
TTGTTATTGATATAATAATGTTATATCAATGTCCTGTCAGATGGAATAGTGTGTTTGGTTGATAACACGACTTCTTAA  
AACAAAATTGATCTTTAAGATTAAGTTTTTATAATTATCATTACTTTAATTTATCGATTTGAAAATGGTAATAGCCTT  
AATCTTTGTGTAATAAGAGATTAGGTGTAATAACTTTAACATTTTTGTCTAGTAAGTTACTATTTTCATACAGAAT  
GATAAAATTAAGAAAAGGCAGGACTGTAAATCATAAATACCTTCTTACAATATAGCAGACTAGATAATAATCT  
TTGTGTTAATGATAATTAAGACATTGACCACGCTCATCAGAAGGCTCGCCAAAATAAACGTTGCAAAAAGGATTC  
CTGGAAAAATGGTCGCACACAAAAATTTAAAAATAAATCTATTTCTTCTTTTTGTGTGTCCTATAGTGAGTCGTAT  
TAACCCGGGATCGATATCCCCCTGCATTAATGAATCGGCCAACGCGCGGGGAGAGGCGGTTTGCCTATTGGGC  
GCTCTTCCGCTTCTCGCTCACTGACTCGCTGCGCTCGGTCGTTGCGCTGCGGCGAGCGGTATCAGCTCACTC  
AAAGGCGGTAATACGGTTATCCACAGAATCAGGGGATAACGCAGGAAAGAACATGTGAGCAAAAGGCCAGCAAA  
AGGCCAGGAACCGTAAAAAGGCCGCGTTGCTGGCGTTTTTCCATAGGCTCCGCCCCCTGACGAGCATCACAA  
AATCGACGCTCAAGTCAGAGGTGGCGAAACCCGACAGGACTATAAAGATACCAGGCGTTTCCCCCTGGAAGCT  
CCCTCGTGCGCTCTCCTGTTCCGACCTGCCGCTTACCGGATACCTGTCCGCCTTTCTCCCTTCGGGAAGCGTG  
GCGCTTTCTCATAGCTCACGCTGTAGGTATCTCAGTTCGGTGTAGGTGCTTCCGCTCCAAGCTGGGCTGTGTGCA  
CGAACCCCGGTTACGCCGACCGCTGCGCCTTATCCGGTAACTATCGTCTTGAGTCCAACCCGGTAAGACACG  
ACTTATCGCCACTGGCAGCAGCCACTGGTAAACAGGATTAGCAGAGCGAGGTATGTAGGCGGTGCTACAGAGTT  
CTTGAAGTGGTGGCCTAACTACGGCTACACTAGAAGAACAGTATTTGGTATCTGCGCTCTGCTGAAGCCAGTTAC  
CTTCGGAAAAAGAGTTGGTAGCTCTTGATCCGGCAACAAACCACCGCTGGTAGCGGTGGTTTTTTTTGTTTGCAA  
GCAGCAGATTACGCGCAGAAAAAAGGATCTCAAGAAGATCCTTTGATCTTTCTACGGGGTCTGACGCTCAGT  
GGAACGAAAACCTACGTTAAGGGATTTTGGTCATGAGATTATCAAAAAGGATCTTACCTAGATCCTTTAAATTA  
AAAATGAAGTTTTAAATCAATCTAAAGTATATAGATAAAGTGGTCTGACAGTTACCAATGCTTAATCAGTGAG  
GCACCTATCTCAGCGATCTGTCTATTTGTTTCATCCATAGTTGCCTGACTCCCCGTGCTGTAGATAACTACGATA  
CGGGAGGGCTTACCATCTGGCCCCAGTGCTGCAATGATACCGCGAGACCCACGCTCACCGGCTCCAGATTTAT  
CAGCAATAAACAGCCAGCCGGAAGGGCCGAGCGCAGAAGTGGTCTGCAACTTTATCCGCCTCCATCCAGTC  
TATTAATTGTTGCCGGGAAGCTAGAGTAAGTAGTTCGCCAGTTAATAGTTTGCGCAACGTTGTTGCCATTGCTAC  
AGGCATCGTGGTGTACGCTCGTCTGTTGGTATGGCTTCATTCAGCTCCGTTCCCAACGATCAAGGCGAGTTA  
CATGATCCCCATGTTGTGCAAAAAGCGGTTAGCTCCTTCGGTCTCCGATCGTTGTCAGAAGTAAGTTGGCC  
GCAGTGTATCACTCATGTTATGGCAGCACTGCATAATTCTTTACTGTATGCCATCCGTAAGATGCTTTTCTG  
TGACTGGTGAAGTCAACCAAGTCACTTGTGAGAATAGTGTATGCGGCGACCGAGTTGCTCTTGCCCGGCGTCA  
ATACGGGATAATACCGCGCCACATAGCAGAACTTTAAAAGTGTCTCATCATTGGAAAACGTTCTTCGGGGCGAAAA  
CTCTCAAGGATCTTACCGCTGTTGAGATCCAGTTGATGTAACCCACTCGTGCACCCAACTGATCTTCAGCATCT  
TTTACTTTCACCAGCGTTTCTGGGTGAGCAAAAACAGGAAGGCAAAATGCCGCAAAAAGGGAATAAGGGCGAC  
ACGGAAATGTTGAATACTCATACTCTTCTTTTCAATATTATTGAAGCATTATCAGGGTTATTGTCTCATGAGCG  
GATACATATTTGAATGTATTTAGAAAAATAACAAATAGGGGTTCCGCGCACATTTCCCCGAAAAGTGCCACCTG  
ACGTCTAAGAAACCATTATTATCATGACATTAACCTATAAAAATAGGCGTATCACGAGGCCCTTTCTGCTCGCGC  
GTTTCGGTGATGACGGTGAAAACCTCTGACACATGCAGCTCCCGGAGACGGTACAGCTTGTCTGTAAGCGGAT  
GCCGGGAGCAGACAAGCCCGTCAGGGCGCGTCAGCGGGTGTGGCGGGTGTGCGGGCTGGCTTAACTATGCC  
GCATCAGAGCAGATTGACTGAGAGTGCACCATTGACGCTCTCCCTTATGCGACTCCTGCATTAAGAAGCAGC  
CCAGTAGTAGTTGAGGCCGTTGAGCACCGCCGCGCAAGGAATGGTGAAGGAGATGGCGCCCAACAGTCC  
CCCGGCCACGGGGCTGCCACCATACCCACGCCGAACAAGCGCTCATGAGCCCGAAGTGCCGAGCCCGATC  
TTCCCATCGGTGATGTGCGCGATATAGGCGCCAGCAACCCGACCTGTGGCGCCGGTGTGCCGGCCACGATG  
CGTCCGGCGTAGAGGATCTGGCTAGCGATGACCCTGCTGATTGGTTCCGCTGACCATTTCCGGGTGCGGGACGG  
CGTTACCAGAAAACCTCAGAAGGTTGTTCCAACCAACCCGACTCTGACGGCAGTTTACGAGAGAGATGATAGGGTC  
TGCTTCAGTAAGCCAGATGCTACACAATTAGGCTTGTACATATTGTGTTAGAACGCGGCTACAATTAATACATAA  
CCTTATGTATCATACACATACGATTTAGGTGACACTATAGAATAACAAGCTTGCATGCCTGCAGGTGCACTCTAGA

GGATCTCGATCCGGATATAGTTCCTCCTTTCAGCAAAAAACCCCTCAAGACCCGTTTAGAGGCCCAAGGGTT  
ATGCTAGTTATTGCTCAGCGGTGGCAGCAGCCAACCTCAGCTTCCTTTCGGGCTTTGTTAGCAGCCGGATCCTTTT  
TTTTGAGCTCTCCCTTAGCCATCCGAGTGGACGACGTCCTCCTTCGGATGCCAGGTCGGACCGCGAGGAGGT  
GGAGATGCCATGCCGACCC

**2. EBOV/Kikwit NP-P2A-VP35**

GACATTGATTATTGACTAGTTATTAATAGTAATCAATTACGGGGTCATTAGTTCATAGCCCATATATGGAGTCCG  
CGTTACATAACTTACGGTAAATGGCCCGCCTGGCTGACCGCCAACGACCCCGCCATTGACGTCAATAATGA  
CGTATGTTCCCATAGTAACGCCAATAGGGACTTTCCATTGACGTCAATGGGTGGAGTATTTACGGTAAACTGCC  
ACTTGGCAGTACATCAAGTGTATCATATGCCAAGTACGCCCCCTATTGACGTCAATGACGGTAAATGGCCCGCCT  
GGCATTATGCCAGTACATGACCTTATGGGACTTTCTACTTGGCAGTACATCTACGTATTAGTCATCGCTATTAC  
CATGGTGATGCGGTTTTGGCAGTACATCAATGGGCGTGGATAGCGGTTTGACTCACGGGGATTTCCAAGTCTCC  
ACCCATTGACGTCAATGGGAGTTTTTTTTGGCACAAAATCAACGGGACTTTCCAAAATGTCGTAACAACCTCCG  
CCCCATTGACGCAAATGGGCGGTAGGCGTGTACGGTGGGAGGTCTATATAAGCAGAGCTCGTTTAGTGAACCG  
TCAGATCGCCTGGAGACGCCATCCACGCTGTTTTGACCTCCATAGAAGACACCGGGACCGATCCAGCCTCCGG  
AATGGATTCTCGTCTCAGAAAAGTCTGGATGACGCCGAGTCTCACTGAATCTGACATGGATTACCACAAGATCTT  
GACAGCAGGTCTGTCCGTTCAACAGGGGATTGTTCCGGCAAAGAGTCATCCAGTGTATCAAGTAAACAATCTTG  
AGGAGATTTGCCAACTTATCATAACAGGCCTTTGAAGCAGGTGTTGATTTTCAAGAGAGTGC GGACAGTTTTCTTC  
TCATGCTTTGTCTTCATCATGCGTACCAGGGAGATTACAACTTTTTCTTGAAAGTGGCGCAGTCAAGTATTTGG  
AAGGGCACGGGTTCCGTTTTGAAGTCAAGAAGCGTGATGGAGTGAAGCGCCTTGAGGAATTGCTGCCAGCAGT  
ATCTAGTGGAAAAACATTAAGAGAACACTTGCTGCCATGCCGGAAGAGGAGACAACCTGAAGCTAATGCCGGTC  
AGTTTCTCTCTTTGCAAGTCTATTCTTCCGAAATTGGTAGTAGGAGAAAAGGCTTGTCTTGAGAAGGTTCAAAG  
GCAAATTCAGTACATGCAGAGCAAGGACTGATACAATATCCAACAGCTTGGCAATCAGTAGGACACATGATGGT  
GATTTTCCGTTTGATGCGAACAAATTTTTGATCAAATTTCTCCTAATACACCAAGGGATGCACATGGTTGCCGGG  
CATGATGCCAACGACGCTGTGATTTCAAATTCAGTGGCTCAAGCTCGTTTTTCAGGTTTATTGATTGTCAAACAG  
TACTTGATCATATCCTACAAAAGACAGAACGCGGAGTTTCGTCTCCATCCTCTTGCAAGGACCGCCAAGGTAAAA  
ATGAGGTGAACTCCTTAAGGCTGCACTCAGCTCCCTGGCCAAGCATGGAGAGTATGCTCCTTTCCGCCGACTT  
TTGAACCTTTCTGGAGTAAATAATCTTGAGCATGGTCTTTTCCCTCAACTATCAGCAATTGCACTCGGAGTCCGCCA  
CAGCACACGGGAGTACCCTCGCAGGAGTAAATGTTGGAGAACAGTATCAACAACCTCAGAGAGGCTGCCACTGA  
GGCTGAGAAGCAACTCCAACAATACGCAGAGTCTCGCGAACTTGACCATCTTGACTTGTATGATCAGGAAAAGA  
AAATTCTTATGAACTTCCATCAGAAAAAGAACGAAATCAGCTTCCAGCAAACAAACGCTATGGTAACTCTAAGAAA  
AGAGCGCCTGGCCAAGCTGACGGAAGCTATCACTGCTGCGTCACTGCCAAAACAAGTGGACATTACGATGATG  
ATGACGACATTCCCTTTCCAGGACCCATCAATGATGACGACAATCCTGGCCATCAAGATGATGATCCAACCTGACT  
CACAAGATACGACCATTCTGATGTGGTGGTTGATCCCGATGATGGAAGCTACGGCGAATACCAGAGTTACTCG  
GAAAACGGCATGAATGCACCAGATGACTTGGTCTATTTCGATCTAGACGAGGACGATGAGGACACTAAGCCAGT  
GCCTAATAGATCAACCAAGGGTGGACAACAGAAAAACAGTCAAAGGGCCAGCATAACAGAGGGCAGACAGACA  
CAATCCAGGCCAACTCAAATGTCCAGGCCCTCACAGAACAATCCACCACGCCAGTGTCTCACTCACGGATAA  
TGACAGAAGAAATGAACCCTCCGGCTCAACCAGCCCTCGCATGCTGACACCAATCAACGAAGAGGCAGACCCA  
CTGGACGATGCCGACGACGAGACGTCTAGCCTTCCGCCCTGGAGTCAGACGATGAAGAACAGGACAGGGAC  
GGAACCTTCAACCGCACACCCACTGTGCCCCACCGGCTCCCGTATACAGAGATCACTCTGAAAAGAGAGAACT  
CCCGCAAGATGAGCAACAAGATCAGGACCACACTCAAGAGGCCAGGAACCAGGACAGTGACAACACCCAGCCA  
GAACACTCTTTTGAGGAGATGTATCGCCACATTCTAAGATCACAGGGGCCATTTGATGCTGTTTTGTATTATCATA  
TGATGAAGGATGAGCCTGTAGTTTTAGTACCAGTGTGGCAAAGAGTACACGTATCCAGACTCCCTTGAAGAG  
GAATATCCACCATGGCTCACTGAAAAGAGGGCTATGAATGAAGAGAATAGATTTGTTACATTGGATGGTCAACAA  
TTTTATTGGCCGGTAATGAATCACAGAATAAATTCATGGCAATCCTGCAACATCATCAGGGATCCGGCGCTACT  
AACTTCAGCCTGCTGAAGCAGGCTGGAGACGTGGAGGAGAACCCTGGACCTATGACAACCAGAACAAGGGCA  
GGGGCCCACTGCGGCCACGACTCAAACGACAGAATGCCAGGCCCTGAGCTTTCCGGGCTGGATCTCTGAGCA  
GCTAATGACCGGAAGAATCCTGTAAGCGACATCTTCTGTGATATTGAGAACAAATCCAGGATTATGCTACGCATC  
CCAAATGCAACAAACCAAGCCAACCCGAAGACGCGCAACAGTCAAACCCAAACGGACCCAATTTGCAATCATA  
GTTTTGAGGAGGTAGTACAAACATTAGCTTCAATTGGCTACTGTTGTGCAACAACAACCAATTGCATCAGAATCATT  
AGAACAACGCATTACGAGTCTTGAGAATGGTCTAAAGCCAGTTTATGATATGGCTAAAACAATCTCCTCATTGAAC  
AGGGTTTGCTGAGATGGTTGCAAAATATGATCTTCTGGTGTGACAACCGGTCCGGGCAACAGCAACCGCTGC  
GGCAACTGAGGCTTATGGGCCGAACATGGTCAACCACCACCTGGACCATCACTTTATGAAGAAAGTGAATTC  
GGGGTAAGATTGAATCTAGAGATGAGACCGTCCCTCAAAGTGTAGGGAGGCATTCAACAATCTAGACAGTACC  
ACTTCACTAACTGAGGAAAAATTTGGGAAACCTGACATTTCCGGCAAAGGATTTGAGAAACATTATGTATGATCACT  
TGCTGTTTTGGAACGCTTTCCACCAATTAGTACAAGTATTTGTAATTTGGGAAAAGATAGCAACTCATTGGA  
CATCATTATGCTGAGTTCCAGGCCAGCCTGGCTGAAGGAGACTCTCCTCAATGTGCCCTAATTCAAATTACAAA  
AAGAGTTCAAATCTTCAAAGATGCTGCTCCACCTGTATCCACATCCGCTCTCGAGGTGACATTCCTCCGAGCTTG  
CCAGAAAAGCTTGCCTCCAGTCCCACCATCGCCAAGATTGATCGAGGTTGGGTATGTGTTTTTCAGCTTCAAGA

TGGTAAACACTTGGACTCAAAATTTGATCTAGAGGTAAGCCTATCCCTAACCTCTCCTCGGTCTCGATTCTAC  
GTAAGATCTAGAAGTAGTGTGACGCAAGGGTTCGATCCCTACCGGTTAGTAATGAGTTTAAATCAACCTCTGGAT  
TACAAAATTTGTGAAAGATTGACTGGTATTCTTAACTATGTTGCTCCTTTTACGCTATGTGGATACGCTGCTTTAAT  
GCCTTTGTATCATGCTATTGCTTCCCGTATGGCTTTCATTTTCTCCTCCTTGTATAAATCCTGGTTGCTGTCTCTTT  
ATGAGGAGTTGTGGCCCGTTGTCAGGCAACGTGGCGTGGTGTGCACTGTGTTTGTGACGCAACCCCACTGG  
TTGGGGCATTGCCACCACCTGTCAGCTCCTTTCCGGGACTTTGCTTTCCCCCTCCCTATTGCCACGGCGGAAC  
TCATCGCCGCTGCCTTGCCTGCTGACAGGGGCTCGGCTGTTGGGCACTGACAATCCCGTGGTGTGTC  
GGGAAGCTGACGTCCTTTCCATGGCTGCTCGCCTGTGTTGCCACCTGGATTCTGCGCGGGACGTCCTTCTGCT  
ACGTCCTTTCGGCCCTCAATCCAGCGGACCTTCTTCCCGCGGCCTGCTGCCGGCTCTGCGGCCTCTTCCGCG  
TCTTCGCTTTCGCCCTCAGACGAGTCGGATCTCCTTTGGGCGGCCTCCCGCAAACGGGGGAGGCTAACTGA  
AACACGGAAGGAGACAATACCGGAAGGAACCCGCGCTATGACGGCAATAAAAAGACAGAATAAAACGCACGGG  
TGTTGGGTCGTTTGTTCATAAACGCGGGGTTGCGTCCCAGGGCTGGCACTCTGTGATACCCACCGAGACCC  
CATTGGGGCCAATACGCCCGCGTTTCTTCTTTTCCCAACCCACCCCAAGTTCGGGTGAAGGCCAGGGCT  
CGCAGCCAACGTGCGGGCGGCAGGCCCTGCCATAGCAGATCTGCGCAGCTGTTTGCAAAGCCTAGGCCTCCA  
AAAAAGCCTCCTCACTACTTCTGGAATAGCTCAGAGGCAGAGGCGGCCTCGGCCTCTGCATAAATAAAAAAATT  
AGTCAGCCATGGGGCGGAGAATGGGCGGAACTGGGCGGAGTTAGGGGCGGGATGGGCGGAGTTAGGGGCGG  
GACTATGGTTGCTGACTAATTGAGATGCATGCTTTCATACTTCTGCCTGCTGGGGAGCCTGGGGACTTTCCACAC  
CCTGGTTGCTGACTAATTGAGATGCATGCTTTCATACTTCTGCCTGCTGGGGAGCCTGGGGACTTTCCACACC  
CTAACTGACACACCAGCTGCATTAATGAATCGGCCAACGCGCGGGGAGAGGCGGTTTTCGCTATTGGGCGCTCT  
TCCGCTTCTCGCTCACTGACTCGCTCGCTCGGTGCTTCCGCTGCGGCGAGCGGTATCAGCTCACTCAAAGG  
CGGTAATACGGTTATCCACAGAATCAGGGGATAACGCAGGAAAGAACATGTGAGCAAAGGCCAGCAAAGGC  
CAGGAACCGTAAAAAGGCCGCGTTGCTGGCGTTTTTCCATAGGCTCCGCCCCCTGACGAGCATCACAAAAATC  
GACGCTCAAGTCAGAGGTGGCGAAACCCGACAGGACTATAAAGATACCAGGCGTTTCCCCCTGGAAGCTCCCT  
CGTGCGCTCTCCTGTTCCGACCCTGCCGCTTACCGGATACCTGTCCGCCTTTCTCCTTCGGGAAGCGTGGCG  
CTTTCTCATAGCTCACGCTGTAGGTATCTCAGTTCGGTGTAGGTCGTTCCGCTCCAAGCTGGGCTGTGTGCACGA  
ACCCCCGTTTACGCCGACCGCTGCGCCTTATCCGGTAACTATCGTCTTGAGTCCAACCCGGTAAGACACGACT  
TATCGCCACTGGCAGCAGCCACTGGTAACAGGATTAGCAGAGCGAGGTATGTAGGCGGTGCTACAGAGTTCTT  
GAAGTGGTGGCCTAACTACGGCTACACTAGAAGAACAGTATTTGGTATCTGCGCTCTGCTGAAGCCAGTTACCTT  
CGGAAAAAGAGTTGGTAGCTCTTGATCCGGCAAACAAACCACCGCTGGTAGCGGTGGTTTTTTGTTTGAAGC  
AGCAGATTACGCGCAGAAAAAAGGATCTCAAGAAGATCCTTTGATCTTTTCTACGGGGTCTGACGCTCAGTGGAA  
ACGAAAACTCACGTTAAGGGATTTTGGTTCATGAGATTATCAAAAAGGATCTTACCTAGATCCTTTTAAATAAAA  
ATGAAGTTTTAAATCAATCTAAAGTATATAGAGTAACTTGGTCTGACAGTTACCAATGCTTAATCAGTGAGGCA  
CCTATCTCAGCGATCTGTCTATTTGTTTCATCCATAGTTGCCTGACTCCCGCTCGTGTAGATAACTACGATACGG  
GAGGGCTTACCATCTGGCCCCAGTGTGCAATGATACCGCGAGACCCACGCTCACCGGCTCCAGATTTATCAG  
CAATAAACCAGCCAGCCGGAAGGGCCGAGCGCAGAAGTGGTCTGCAACTTTATCCGCTCCATCCAGTCTATT  
AATTGTTGCCGGAAGCTAGAGTAAGTAGTTCGCCAGTTAATAGTTTGCGCAACGTTGTTGCCATTGCTACAGGC  
ATCGTGGTGTACGCTCGTCTGTTTGGTATGGCTTCAATCAGCTCCGGTCCCAACGATCAAGGCGAGTTACATG  
ATCCCCATGTTGTGCAAAAAGCGTTAGCTCCTTCCGTCCTCCGATCGTTGTCAGAAGTAAGTTGGCCGAG  
TGTTATCACTCATGGTTATGGCAGCACTGCATAATTCTTACTGTATGCCATCCGTAAGATGCTTTTTCTGTGAC  
TGGTGAGTACTCAACCAAGTCACTTCTGAGAATAGTGTATGCGGCGACCGAGTTGCTCTTGCCTGGCGTCAATAC  
GGGATAATACCGCGCCACATAGCAGAACTTTAAAAGTGTCTCATCATTGGAAAACGTTCTTCCGGGGCGAAAACCT  
CAAGGATCTTACCGCTGTTGAGATCCAGTTCCGATGTAACCCACTCGTGCACCCAACTGATCTTACGATCTTTTA  
CTTTCACCAGCGTTTCTGGGTGAGCAAAAACAGGAAGGCAAATGCCGCAAAAAGGGGAATAAGGGCGACACG  
GAAATGTTGAATACTCATACTCTTCTTTTCAATATTATTGAAGCATTATCAGGGTTATTGTCTCATGAGCGGAT  
ACATATTTGAATGTATTTAGAAAAATAACAATAGGGGTTCCGCGCACATTTCCCGAAAAGTGCCACCTGACG  
TCGACGGATCGGGAGATCTCCCGATCCCCTATGGTGCCTCTCAGTACAATCTGCTCTGATGCCGCATAGTTAA  
GCCAGTATCTGCTCCCTGCTTGTGTGTTGGAGGTGCTGAGTAGTGCGCGAGCAAAATTTAAGCTACAACAAGG  
CAAGGCTTGACCGACAATTGCATGAAGAATCTGCTTAGGGTTAGGCGTTTTGCGCTGCTTCGCGATGTACGGGC  
CAGATATACGCGTT

**3. EBOV/Kikwit L**

GACATTGATTATTGACTAGTTATTAATAGTAATCAATTACGGGGTCATTAGTTCATAGCCCATATATGGAGTCCG  
CGTTACATAACTTACGGTAAATGGCCCGCCTGGCTGACCGCCAACGACCCCGCCATTGACGTCAATAATGA  
CGTATGTTCCCATAGTAACGCCAATAGGGACTTTCCATTGACGTCAATGGGTGGAGTATTTACGGTAAACTGCC  
ACTTGGCAGTACATCAAGTGTATCATATGCCAAGTACGCCCCCTATTGACGTCAATGACGGTAAATGGCCCGCCT  
GGCATTATGCCAGTACATGACCTTATGGGACTTTCTACTTGGCAGTACATCTACGTATTAGTCATCGCTATTAC  
CATGGTGATGCGGTTTTGGCAGTACATCAATGGGCGTGGATAGCGGTTTGACTCACGGGGATTTCCAAGTCTCC  
ACCCATTGACGTCAATGGGAGTTTTTTTTGGCACAAAATCAACGGGACTTTCCAAAATGTCGTAACAACCTCCG  
CCCCATTGACGCAAATGGGCGGTAGGCGTGTACGGTGGGAGGTCTATATAAGCAGAGCTCGTTTAGTGAACCG  
TCAGATCGCCTGGAGACGCCATCCACGCTGTTTTGACCTCCATAGAAGACACCGGGACCGATCCAGCCTCCGG  
AATGGCTACACAACATACCCAATACCCGGACGCTAGGTTATCATACCAATTGTATTGGACCAATGTGACCTAGT  
CACTAGAGCTTGC GGTTATATTCATCATACTCCCTTAATCCGCAACTACGCAACTGTA AACTCCC GAAACATATC  
TACCGTTTTGAAATACGATGTA AACTGTTACCAAGTCTTGAGTGATGTACCAGTGGCGACATTGCCCATAGATTTCA  
TAGTCCCAATTCTTCTCAAGGCACTGTCAGGCAATGGGTTCTGTCTGTTGAGCCGCGGTGCCAACAGTTCTTAG  
ATGAAATCATTAAAGTACACAATGCAAGATGCTCTCTTCTGAAATATTATCTCAAAAATGTGGGTGCTCAAGAAGA  
CTGTGTTGATGACCACTTTCAAGAGAAAATCTTATCTTCAATTCAGGGCAATGAATTTTTACATCAAATGTTTTCT  
GGTATGATCTGGCTATTTAACTCGAAGGGGTAGATTA AATCGAGGAAACTCTAGATCAACATGGTTTTGTT CATG  
ATGATTTAATAGACATCTTAGGTTATGGGACTATGTTTTTTGAAAGATCCCAATTTCAATGTTACCACTGAACAC  
ACAAGGAATCCCCATGCTGCTATGGACTGGTATCAGGCATCAGTATTC AAAGAAGCGGTTCAAGGGCATAACAC  
ACATTGTTTCTGTTTCTACTGCCGACGCTTGATAATGTGCAAAGATTTAATTACATGTCGATTCAACACA AACTCTA  
ATCTCAAAAATAGCAGAGATTGAGGATCCAGTTTGTTCTGATTATCCCAATTTAAGATTGTGTCTATGCTTTACCA  
GAGCGGAGATTACTTACTCTCCATATTAGGGTCTGATGGGTATAAAAATTATTAAGTTCCTCGAACCAATTGTGCTTG  
GCCAAAATTC AATTATGCTCAAAGTACACCGAGAGGAAGGGCCGATTCTTAACACAAATGCATTTAGCTGTAAAT  
CACACCCTAGAAGAAATTACAGAAATGCGTGC ACTAAAGCCTTACAGGGCTCAAAAAGATCCGTGAATTCATAGA  
ACATTGATAAGGCTGGAGATGACGCCACAACAGCTTTGTGAGCTATTTTCCATTCAAAAACACTGGGGGCATCCT  
GTGCTACATAGTGAACAGCAATCCAAAAGTTAAAAACATGCTACGGTGCTAAAAGCATTACGCCCTATAGTG  
ATTTTCGAGACATACTGTGTTTTTAAATATAGTATTGCCAAACATTATTTTGATAGTCAAGGGTCTTGGTACAGTGT  
TACTTCAGATAGGAATCTAACACCAGGTCTTAATCTTATATCAAAAAGAAATCAATTCCTCCGTTGCCAATGATTA  
AAGAACTACTATGGGAATTTTACCACCTTGACCATCCTCCACTTTTCTCAACCAAAATTATTAGTGACTTAAGTATT  
TTTATAAAAGACAGAGCTACTGCAGTAGAAAGGACATGCTGGGATGCAGTATTCGAGCCTAATGTTCTAGGATAT  
AATCCACCTCACAAATTTAGTACTAAACGTGTACCGGAACAATTTTATAGAGCAAGAAAACCTTTTCTATTGAGAATG  
TTCTTTCCTACGCGCAAAAACCTCGAGTATCTACTACCACAATATCGGAACTTTTCTTTCATTGAAAGAGAAAGA  
GTTGAATGTAGGTAGAACCTTCGGAAAATTGCCTTATCCGACTCGCAATGTTCAAACACTTTGTGAAGCTCTGTTA  
GCTGATGGTCTTGCTAAAGCATTTCCTAGCAATATGATGGTAGTTACGGAACGTGAGCAAAAAGAAAGCTTATTG  
CATCAAGCATCATGGCACCACACAAGTGATGATTTTGGTGAACATGCCACAGTTAGAGGGAGTAGCTTTGTA AACT  
GATTTAGAGAAATACAATCTTGCAATTTAGATATGAGTTTACAGCACCTTTTATAGAATATTGCAACCGTTGCTATG  
GTGTTAAGAATGTTTTTAAATTGGATGCATTATACAATCCCACAGTGTTATATGCATGTCAGTGATTATTATAATCCA  
CCACATAACCTCACACTGGAAAATCGAGACAACCCCGGAAAGGGCCTAGTTCATACAGGGGTCATATGGGAGG  
GATTGAAGGACTGCAACAAAACCTCTGGACAAGTATTTTATGTGCTCAAATTTCTTTAGTTGAAATTAAGACTGGT  
TTTAAGTTACGCTCAGCTGTGATGGGTGACAATCAGTGCATTACCGTTTTATCAGTCTTCCCTTAGAGACTGAC  
GCAGACGAGCAGGAACAGAGCGCCGAAGACAATGCAGCGAGGGTGGCCGCTAGCCTAGCAAAAGTTACAAGT  
GCCTGTGGAATCTTTTTAAACCTGATGAAACATTTGTACATTCAGGTTTTATCTATTTTGGAAAAAACAATATTT  
GAATGGGGTCCAATTCCTCAGTCCCTTAAACGGCTACAAGAATGGCACCATTGTCTGATGCAATTTTTGATGA  
TCTTCAAGGGACCCTAGCTAGTATAGGCACTGCTTTTGGAGCGATCCATCTCTGAGACACGACATATCTTTCCTTG  
CAGGATAACCGCAGCTTTCCATACGTTTTTTTTCGGTGAGAATCTTGCAATATCATCATCTCGGGTTCAATAAAGGT  
TTTGACCTTGACAGTTAACACTCGGTA AACCTCTGGATTTCCGGAACAATATCATTGGCACTAGCGGTACCGCAG  
GTGCTTGGAGGATTATCCTTCTTGAATCCTGAGAAATGTTTCTACCGGAATCTAGGAGATCCAGTTACCTCAGGT  
TTATCCAGTTAAAACCTTATCTCCGAATGATTGAGATGGATGATTTATTCTTACCTTTAATTGCAAAGAACCCTGG  
GAACTGCACTGCCATTGACTTTGTGCTAAATCCTAGCGGATTAATGTCCCTGGGTCGCAAGACTTAACTTCATTT  
CTGCGCCAGATTGTACGCAGGACCATCACCTAAGTGCGAAAAACA AACTTATTAATACCTTATTTTCATGCGTCA  
GCTGACTTCGAAGACGAAATGTTTTGTA AATGGCTATTATCATCAACTCCTGTTATGAGTCGTTTTGCGGCCGAT  
ATCTTTTACGCACGCGGAGCGGGAAAGCGATTGCAAATCTAGGATACCTGGAAAGAACACGCACATTATTAGC  
CTCTAGGATCATCAACAATAATACAGAGACACCGGTTTTGGACAGACTGAGGAAAATAACATTGCAAAGGTGGAG  
TCTGTGGTTTTAGTTATCTTGATCATTGTGATAATATCTGGCGGAGGCTTTAACCCAAATAACTTGCACAGTTGAT

TTAGCACAGATCCTGAGGGAATATTCATGGGCTCATATTTTATAGAGGGAAGACCTCTTATTGGAGCCACACTCCCA  
TGTATGATTGAGCAATTCAAAGTGTTTTGGCTGAAACCCTACGAACAATGTCCGCAGTGTTCAAATGCAAAGCAA  
CCAGGTGGGAAACCATTTCGTGTCAGTGGCAGTCAAGAAACATATTGTTAGTGCATGGCCTAACGCATCCCGACT  
AAGCTGGACTATCGGGGATGGAATCCCTTACATTGGATCAAGGACAGAAGATAAGATAGGACAACCTGCTATTAA  
ACCAAATGTCTTCCGCAGCCTTAAGAGAGGCCATTGAATTGGCGTCCCGTTTAAACATGGGTAACCAAGGCA  
GTTTCGAACAGTGACTTGCTAATAAAGCCATTTTTGGAAGCACGAGTAAATTTAAGTGTTCAAGAAATACTTCAAAT  
GACCCCTTACATTACTCAGGAAATATTGTTACAGGTACAACGATCAATACAGTCCTCATTCTTTCATGGCCAAT  
CGTATGAGTAATTCAGCAACGCGATTGATTGTTTCTACAAACACTTTAGGTGAGTTTTTCAGGAGGTGGCCAGTCT  
GCACGCGACAGCAATATTATTTTCCAGAATGTTATAAATTATGCAGTTGCACTGTTTCGATATTAATTTAGAAACA  
CTGAGGCTACAGATATCCAATATAATCGTGCTCACCTTCATCTAATAAGTGTTCACCCGGGAAGTACCAGCTC  
AGTATTTAACATACACATCTACATTGGATTTAGATTTAACAAGATACCGAGAAAACGAATTGATTTATGACAATAAT  
CCTCTAAAAGGAGGACTCAATTGCAATATCTCATTGATAACCCATTTTTCCAAGGTAACAGCTGAACATTATAG  
AAGATGATCTTATTCGACTGCCTCATTATCTGGATGGGAGCTAGCCAAGACCATCATGCAATCAATTATTTTCCAG  
TAGCAACAATTCATCTACAGACCCAATTAGCAGTGGAGAAACAAGATCATTCACTACCCATTTCTTAACTTATCCC  
AAGATAGGACTTCTGTACAGTTTTGGGGCCTTTGTAAGTTATTATCTGGCAATACAATTTCTCGGACTAAGAAAT  
TGACACTTGACAATTTTTTATATTACTTAACTACCCAAATTCATAATCTACCACATCGCTCATTGCGAATACTTAA  
CCAACATTCAAACATGCAAGCGTTATGTCACGGTTAATGAGTATTGATCCTCATTTTTTCTATTTACATAGGCGGTG  
CTGCAGGTGACAGAGGACTCTCAGATGCGGCCAGGTTATTTTTGAGAACGTCTATTTTCATCTTTTTCTTACATTTGT  
AAAAGAATGGATAATTAATCGCGGAACAATTGTCCCTTTATGGATAGTATATCCGCTAGAGGGTCAAACCCCAAC  
ACCTGTTAATAATTTTTCTCTATCAGATCGTAGAACTGCTGGTGCATGATTCATCAAGACAACAGGCTTTAAAAACT  
ACCATAAGTGATCATGTACATCCTCACGACAATCTGTTTACACATGTAAGAGTACAGCCAGCAATTTCTTCCATG  
CATCATTGGCGTACTGGAGGAGCAGGCACAGAAACAGCAACCGAAAATACTTGGCAAGAGACTCTTCAACTAGA  
TCAAGCACAAACAACAGTGATGGTCATATTGAGAGAAGTCAAGAACAACACCAGAGATCCACATGATGGCACT  
GAACGGAATCTAGTTCTACAAATGAGCCATGAAATAAAAAGAACGACAATTCACAAGAAAACACGCACCAGGGT  
CCGTCGTTCCAGTCTTTCTAAGTTACTCTGCTTGTGGTACAGCAAATCCAAAATAAATTTTCGATCGATCGAGAC  
ACAATGTGAAATCTCAGGATCATAACTCGGCATCCAAGAGGGAAGGTTCATCAAATAATCTCACACCGTCTAGTCC  
TACCTTTCTTTACATTATCTCAAGGGACACGCCAATTAACGTATCTAATGAGTCACAGACCCAAGACGAGATATC  
AAAGTACTTACGGCAATTGAGATCCGTCATTGATACCACAGTTTATTGTAGGTTTACCGGTATAGTCTCGTCCATG  
CATTACAACTTGTAGGAGTCTTTGGGAAATAGAGAGTTTTAAGTCCGGCTGTGACGCTAGCAGAGGGAGAAGG  
TGCTGGTGCCTTACTATTGATTCAGAAAATACCAAGTTAAGACCTTATTTTTCAACACGCTAGCTACTGAGTCCAGT  
ATAGAGTCAGAAATAGTATCAGGAATGACTACTCCTAGGATGCTTCTACCTGTTATGTCAAAATTCATAATGACC  
AAATTGAGATTATTCTTAACTCAGCAAGCCAAATAACAGACATAACAAATCCTACTTGGTTTAAAGACCAAAG  
AGCAAGGCTACCTAAGCAAGTCGAGGTTATAACCATGGATGCAGAGACGCACAGAGAATATAAACAGATCGAAAT  
TGTACGAAGCTGTATATAAACTGATCTTACACCATATTGATCCCAGCGTATTGAAAGCAGTGGTCCTTAAAGTCTT  
CCTAAGTGATACTGAGGGTATGTTATGGCTAAATGATAATTTAGCCCCGTTTTTTGCCACTGGTTATTTAATTAAG  
CCAATAACGTCAAGTGCTAGATCTAGTGGTATCTTTGTCTGACGAACTTCTTATCAACTACACGAAAGATG  
CCACACCAAACCATCTCAGTTGTAACAGGTAATACTTACGGCATTGCAACTGCAAATTCACGGAGCCCATAC  
TGGCTAAGTCATTTAACTCAGTATGCTGACTGTGATTTACATTTAAGTTATATCCGCCTTGGTTTTCCATCATTAGA  
GAAAGTACTATAACACAGGTATAACCTCGTCGATTCAAAAAGAGGTCCTACTAGTCTCTATCACTCAGCACTTAGC  
ACATCTTAGAGCAGAGATTTCGAGAATTAATAATGATTATAATCAACAGCGACAAAGTCGAACTCAAACATATCAC  
TTTATTCGTAAGTCAAAAAGGACGAATCACAAAATACTAGTCAATGATTATTTAAATTTCTTTCTTATTGTGCAAGCATT  
AAAACATAATGGGACATGGCAAGCTGAGTTTAAAGAAATACCAGAGTTGATTAGTGTGTGCAATAGGTTCTACCA  
TATTAGAGATTGCAATTGTGAAGAAGCTTTCTTAGTTCAAACCTTATTTTACATAGAATGCAGGATTCTGAAGTTA  
AGCTTATCGAAAGGCTGACAGGGCTTCTGAGTTTATTTCCGGATGGTCTCTACAGGTTTGATTGATCTAGAGGTA  
AGCCTATCCCTAACCCTCTCCTCGGTCTCGATTCTACGTAAGATCTAGAAGTGTGCGACGCAAGGGTTCGATC  
CCTACCGGTTAGTAATGAGTTTAACTAACCTCTGGATTACAAAATTTGTGAAAGATTGACTGGTATTCTTAACTAT  
GTTGCTCCTTTTACGCTATGTGGATACGCTGCTTTAATGCCTTTGTATCATGCTATTGCTTCCCGTATGGCTTTCA  
TTTTCTCCTCCTTGATAAATCCTGGTTGCTGTCTTTATGAGGAGTTGTGGCCCGTTGTGAGGCAACGTGGCG  
TGGTGTGCACTGTGTTGCTGACGCAACCCCACTGGTTGGGGCATTGCCACCACCTGTCAGCTCCTTTCCGGG  
ACTTTCCGCTTTCCCCCTCCCTATTGCCACGGCGGAACTCATCGCCGCTGCTTGCCTGCTGCTGGACAGGGG  
CTCGGCTGTTGGGCACTGACAATCCGTGGTGTGTCGGGGAAAGCTGACGTCTTTCCATGGCTGCTCGCCTGT  
GTTGCCACCTGGATTCTGCGCGGGACGTCTTCTGCTACGTCCCTTCGGCCCTCAATCCAGCGGACCTTCCCTC  
CCGCGGCTGCTGCCGGCTCTGCGGCTCTTCCGCGTCTTCGCTTCCGCTCAGACGAGTCGGATCTCCCTT  
TGGGCCGCTCCCGCAAACGGGGGAGGCTAACTGAAACACGGAAGGAGACAATACCGGAAGGAACCCGCGC



TATGACGGCAATAAAAAGACAGAATAAAACGCACGGGTGTTGGGTGCTTTGTTTCATAAACGCGGGGTTCCGGTCC  
CAGGGCTGGCACTCTGTGATACCCACCGAGACCCATTGGGGCCAATACGCCCGCTTTCTTCCTTTTCCCC  
ACCCACCCCCCAAGTTCGGGTGAAGGCCAGGGCTCGCAGCCAACGTCGGGGCGGCAGGCCCTGCCATAGC  
AGATCTGCGCAGCTGTTTGAAAAGCCTAGGCCTCAAAAAAGCCTCCTCACTACTTCTGGAATAGCTCAGAGG  
CAGAGGCGGCCTCGGCCTCTGCATAAATAAAAAAATTAGTCAGCCATGGGGCGGAGAATGGGCGGAAGTGGG  
CGGAGTTAGGGGCGGGATGGGCGGAGTTAGGGGCGGGACTATGGTTGCTGACTAATTGAGATGCATGCTTTGC  
ATACTTCTGCCTGCTGGGGAGCCTGGGGACTTTCCACACCTGGTTGCTGACTAATTGAGATGCATGCTTTGCATA  
CTTCTGCCTGCTGGGGAGCCTGGGGACTTTCCACACCCTAACTGACACACCAGCTGCATTAATGAATCGGCCAA  
CGCGCGGGGAGAGGCGGTTTTGCGTATTGGGCGCTCTTCCGCTTCTCGCTCACTGACTCGCTGCGCTCGGTCCG  
TTCGGCTGCGGGCAGCGGTATCAGCTCACTCAAAGGCGGTAATACGGTTATCCACAGAATCAGGGGATAACGC  
AGGAAAGAACATGTGAGCAAAGGCCAGCAAAGGCCAGGAACCGTAAAAAGGCCGCGTTCGCTGGCGTTTTTC  
CATAGGCTCCGCCCCCTGACGAGCATCACAAAATCGACGCTCAAGTCAGAGGTGGCGAAACCCGACAGGAC  
TATAAAGATAACAGGCGTTTTCCCCCTGGAAGCTCCCTCGTGGCGCTCTCCTGTTCCGACCCTGCCGTTACCGGA  
TACCTGTCCGCTTTCTCCCTTCGGGAAGCGTGGCGTTTTCTCATAGCTCACGCTGTAGGTATCTCAGTTCGGT  
GTAGGTCGTTGCTCCAAGCTGGGCTGTGTGCACGAACCCCCGTTACGCCCGACCGCTGCGCCTTATCCGGT  
AACTATCGTCTTGAGTCCAACCCGGTAAGACACGACTTATCGCCACTGGCAGCAGCCACTGGTAACAGGATTAG  
CAGAGCGAGGTATGTAGGCGGTGCTACAGAGTTCTTGAAGTGGTGGCCTAACTACGGCTACACTAGAAGAACAG  
TATTTGGTATCTGCGCTCTGCTGAAGCCAGTTACCTTCGGAAAAAGAGTTGGTAGCTCTTGATCCGGCAAACAAA  
CCACCGCTGGTAGCGGTGTTTTTTTTGTTTGAAGCAGCAGATTACGCGCAGAAAAAAGGATCTCAAGAAGAT  
CCTTTGATCTTTTCTACGGGGTCTGACGCTCAGTGAACGAAAACCTCACGTTAAGGGATTTTGGTCATGAGATTA  
TCAAAAAGGATCTTACCTAGATCCTTTTAAATTAATAAATGAAGTTTTAAATCAATCTAAAGTATATATGAGTAAAC  
TTGGTCTGACAGTTACCAATGCTTAATCAGTGAGGCACCTATCTCAGCGATCTGTCTATTTTCGTTTCATCCATAGTT  
GCCTGACTCCCCGTCGTGTAGATAACTACGATACGGGAGGGCTTACCATCTGGCCCCAGTGCTGCAATGATACC  
GCGAGACCCACGCTCACCGGCTCCAGATTTATCAGCAATAAACAGCCAGCCGGAAGGGCCGAGCGCAGAAGT  
GGTCTGCAACTTTATCCGCCTCCATCCAGTCTATTAATTGTTGCCGGGAAGCTAGAGTAAGTAGTTCCGCCAGTT  
AATAGTTTGCGCAACGTTGTTGCCATTGCTACAGGCATCGTGGTGTACGCTCGTCTTTGGTATGGCTTCATTC  
AGCTCCGTTCCCAACGATCAAGGCGAGTTACATGATCCCCATGTTGTGCAAAAAAGCGGTTAGCTCCTTCGG  
TCCTCCGATCGTTGTCAGAAGTAAGTTGGCCGAGTGTATCACTCATGGTTATGGCAGCACTGCATAAATCTCT  
TACTGTGATGCCATCCGTAAGATGCTTTTCTGTGACTGGTGAGTACTCAACCAAGTCATTCTGAGAATAGTGTATG  
CGGCGACCGAGTTGCTCTTGCCTGGCGTCAATACGGGATAATACCGCGCCACATAGCAGAACTTTAAAAGTGTCT  
CATCATTGGAAAACGTTCTTCGGGGCGAAAACCTCAAGGATCTTACCGCTGTTGAGATCCAGTTTCGATGTAACC  
CACTCGTGACCCAACTGATCTTCAGCATCTTTTACTTTACCAGCGTTTCTGGGTGAGCAAAAACAGGAAGGCA  
AAATGCCGCAAAAAAGGGAATAAGGGCGACACGGAATGTTGAATACTCATACTCTTCTTTTCAATATTATTGA  
AGCATTTATCAGGGTTATTGCTCATGAGCGGATACATATTTGAATGTATTTAGAAAAATAACAAATAGGGGTTCC  
CGCGCACATTTCCCGAAAAGTGCCACCTGACGTGACGGATCGGGAGATCTCCCGATCCCCTATGGTGCATCT  
CTCAGTACAATCTGCTCTGATGCCGATAGTTAAGCCAGTATCTGCTCCCTGCTTGTGTGTTGGAGGTCGCTGAG  
TAGTGCGCGAGCAAAATTAAGCTACAACAAGGCAAGGCTTGACCGACAATTGCATGAAGAATCTGCTTAGGGTT  
AGGCGTTTTGCGCTGCTTCGCGATGTACGGGCCAGATATACGCGTT

**4. EBOV/Kikwit VP30**

GACATTGATTATTGACTAGTTATTAATAGTAATCAATTACGGGGTCATTAGTTCATAGCCCATATATGGAGTCCG  
CGTTACATAACTTACGGTAAATGGCCCCGCTGGCTGACCGCCCAACGACCCCCGCCATTGACGTCAATAATGA  
CGTATGTTCCCATAGTAACGCCAATAGGGACTTTCCATTGACGTCAATGGGTGGAGTATTTACGGTAAACTGCC  
ACTTGGCAGTACATCAAGTGTATCATATGCCAAGTACGCCCCCTATTGACGTCAATGACGGTAAATGGCCCCGCT  
GGCATTATGCCAGTACATGACCTTATGGGACTTTCTACTTGGCAGTACATCTACGTATTAGTCATCGCTATTAC  
CATGGTGATGCGGTTTTGGCAGTACATCAATGGGCGTGGATAGCGGTTTGACTCACGGGGATTTCCAAGTCTCC  
ACCCATTGACGTCAATGGGAGTTTTTTTTGGCACAAAATCAACGGGACTTTCCAAAATGTCGTAACAACCTCCG  
CCCCATTGACGCAAATGGGCGGTAGGCGGTACGGTGGGAGGTCTATATAAGCAGAGCTCGTTTAGTGAACCG  
TCAGATCGCCTGGAGACGCCATCCACGCTGTTTTGACCTCCATAGAAGACACCGGGACCGATCCAGCCTCCGG  
AATGGAAGCTTCATATGAGAGAGGACGCCACGAGCTGCCAGACAGCATTCAAGGGATGGACACGACCACCAT  
GTTTCGAGCACGATCATCATCCAGAGAGAATTATCGAGGTGAGTACCGTCAATCAAGGAGCGCCTCACAAGTGCC  
CGTTCCTACTGTATTTATAAGAAGAGAGTTGAACCATTAACAGTTCCTCCAGCACCTAAAGACATATGTCGGAC  
CTTGAAAAAAGGATTTTTGTGTGACAGTAGTTTTGCAAAAAAGATCACCAGTTGGAGAGTTTAACTGATAGGGAA  
TACTCCTACTAATCGCCGTAAGACTTGTGGATCAGTAGAACAACAATTAATATAACTGCACCCAAGGACTCG  
CGCTTAGCAAATCCAACGGCTGATGATTTCCAGCAAGAGGAAGGTCCAAAAATTACCTTGTGACTCTGATCAAG  
ACGGCAGAACACTGGGCGAGACAAGACATCAGAACCATAGAGGATTCAAAATTAAGAGCATTGTTGACTCTATGT  
GCTGTGATGACGAGGAAATTCTCAAATCCCAGCTGAGTCTTTTATGTGAGACACACCTAAGGCGTGAGGGGCT  
TGGGCAAGATCAGGCAGAACCTGTTCTCGAAGTATATCAACGATTACACAGTGATAAAGGAGGCAGTTTTGAAG  
CTGCACTATGGCAACAATGGGACCGACAATCCCTAATTATGTTTATCACTGCATTCTTGAATATCGCTCTCCAGTT  
ACCGTGTGAAAGTTCTGCTGTCGTTGTTTCAGGGTTAAGAACATTGGTTCCTCAATCAGATAATGAGGAAGCTTC  
AACCAACCCGGGGACATGCTCATGGTCTGATGAGGGTACCCCTTAATCTAGAGGTAAGCCTATCCCTAACCTC  
TCCTCGGTCTCGATTCTACGTAAGATCTAGAAGTAGTGTGACGCAAGGGTTCGATCCCTACCGGTTAGTAATGA  
GTTTAACTCAACCTCTGGATTACAAAATTTGTGAAAGATTGACTGGTATTCTTAACTATGTTGCTCCTTTTACGCTAT  
GTGGATACGCTGCTTAAATGCCTTTGTATCATGCTATTGCTTCCCGTATGGCTTTCATTTTCTCCTCCTTGATAAA  
TCCTGGTTGCTGTCTCTTTATGAGGAGTTGTGGCCGTTGTGACGGCAACGTGGCGTGGTGTGCACTGTGTTTGC  
TGACGCAACCCCACTGGTTGGGGCATTGCCACCACCTGTCAGCTCCTTCCGGGACTTTCCGTTTCCCCCTCC  
CTATTGCCACGGCGGAACCTCATCGCCGCTGCCTTGCCGCTGCTGGACAGGGGCTCGGCTGTTGGGCACTGA  
CAATTCCGTGGTGTGTCGGGGAAAGCTGACGTCTTTCCATGGCTGCTCGCCTGTGTTGCCACCTGGATTCTGC  
GCGGGACGTCTTCTGCTACGTCCCTTCGGCCCTCAATCCAGCGGACCTTCTTCCCGCGGCCTGCTGCCGGC  
TCTGCGGCCTTCCGCGTCTTCCGCTTCCGCTCAGACGAGTCGGATCTCCCTTGGGCCGCTCCCCGAAA  
CGGGGGAGGCTAACTGAAACACGGAAGGAGACAATACCGGAAGGAACCCGCGCTATGACGGCAATAAAAAAGAC  
AGAATAAAACGCACGGGTGTTGGGTCGTTTGTTCATAAACGCGGGGTTCCGTCCCAGGGCTGGCACTCTGTGC  
ATACCCACCGAGACCCCATGGGGCCAATACGCCCGCTTTCTTCTTTTCCCCACCCCAAGTTTCG  
GGTGAAGGCCAGGGCTCGCAGCCAACGTGCGGGCGGCAGGCCCTGCCATAGCAGATCTGCGCAGCTGTTTG  
CAAAAGCCTAGGCCTCAAAAAAGCCTCCTCACTACTTCTGGAATAGCTCAGAGGCAGAGGCGGCCTCGGCCTC  
TGCATAAATAAAAAAATTAGTCAGCCATGGGGCGGAGAATGGGCGGAACTGGGCGGAGTTAGGGGCGGGATG  
GGCGGAGTTAGGGGCGGACTATGGTTGCTGACTAATTGAGATGCATGCTTTGCATACTTCTGCCTGCTGGGGA  
GCCTGGGGACTTTCCACACCTGGTTGCTGACTAATTGAGATGCATGCTTTGCATACTTCTGCCTGCTGGGGAGC  
CTGGGGACTTTCCACACCCTAACTGACACACCAGCTGCATTAATGAATCGGCCAACGCGCGGGGAGAGGCGGT  
TTGCGTATTGGGCGCTTCCGCTTCTCCTGCTCACTGACTCGCTGCGCTCGGTTCGTTCCGGCTGCGGCGAGCGG  
TATCAGCTCACTCAAAGGCGGTAATACGGTTATCCACAGAATCAGGGGATAACGCAGGAAAGAACATGTGAGCA  
AAAGGCCAGCAAAGGCCAGGAACCGTAAAAAGGCCGCTTGTGCGGTTTTTCCATAGGCTCCGCCCCCTG  
ACGAGCATCACAAAAATCGACGCTCAAGTCAGAGGTGGCGAAACCCGACAGGACTATAAAGATAACAGGCGTTT  
CCCCCTGGAAGCTCCCTCGTGCGCTCTCCTGTTCCGACCCTGCCGCTTACCGGATACCTGTCCGCCTTTCTCCC  
TTCGGGAAGCGTGGCGCTTTCTCATAGCTCACGCTGTAGGTATCTCAGTTCGGTGTAGGTGTTCCGCTCCAAGC  
TGGGCTGTGTGCACGAACCCCGTTCCAGCCCGACCGCTGCGCCTTATCCGGTAACTATCGTCTTGAGTCCAAC  
CCGGTAAGACACGACTTATCGCCACTGGCAGCAGCCACTGGTAACAGGATTAGCAGAGCGAGGTATGTAGGCG  
GTGCTACAGAGTTCTTGAAGTGGTGGCCTAACTACGGCTACACTAGAAGAACAGTATTTGGTATCTGCGCTCTGC  
TGAAGCCAGTTACCTTCGGAAAAAGAGTTGGTAGCTCTTGATCCGGCAAACAAACCACCGCTGGTAGCGGTGGT  
TTTTTTGTTTGAAGCAGCAGATTACGCGCAGAAAAAAGGATCTCAAGAAGATCCTTTGATCTTTTCTACGGGGT  
CTGACGCTCAGTGGAAACGAAAACCTCACGTTAAGGGATTTTGGTTCATGAGATTATCAAAAAGGATCTTACCTAGA  
TCCTTTTAAATTAATAAATGAAGTTTTAAATCAATCTAAAATATATGAGTAAACTTGGTCTGACAGTTACCAATGC  
TTAATCAGTGAGGCACCTATCTCAGCGATCTGTCTATTTTCGTTTCATCCATAGTTGCCTGACTCCCCGTGCTGAG

ATAACTACGATACGGGAGGGCTTACCATCTGGCCCCAGTGCTGCAATGATACCGCGAGACCCACGCTCACCGG  
CTCCAGATTTATCAGCAATAAACCAGCCAGCCGGAAGGGCCGAGCGCAGAAGTGGTCCTGCAACTTTATCCGCC  
TCCATCCAGTCTATTAATTGTTGCCGGGAAGCTAGAGTAAGTAGTTCGCCAGTTAATAGTTTGCGCAACGTTGTT  
GCCATTGCTACAGGCATCGTGGTGTACGCTCGTCGTTTGGTATGGCTTCATTTCAGCTCCGGTTCCCAACGATC  
AAGGCGAGTTACATGATCCCCATGTTGTGCAAAAAAGCGTTAGCTCCTTCGGTCCTCCGATCGTTGTCAGAA  
GTAAGTTGGCCGCAGTGTTATCACTCATGTTATGGCAGCACTGCATAATTCTTACTGTCATGCCATCCGTAA  
GATGCTTTTCTGTGACTGGTGAGTACTCAACCAAGTCATTCTGAGAATAGTGTATGCGGCGACCGAGTTGCTCTT  
GCCCCGGCGTCAATACGGGATAATAACCGCGCCACATAGCAGAACTTTAAAAGTGCTCATCATTGGAAAACGTTCTT  
CGGGGCGAAAACCTCTCAAGGATCTTACCGCTGTTGAGATCCAGTTCGATGTAACCCACTCGTGCACCCAACTGA  
TCTTCAGCATCTTTTACTTTACCAGCGTTTCTGGGTGAGCAAAAACAGGAAGGCAAAATGCCGCAAAAAAGGGA  
ATAAGGGCGACACGGAAATGTTGAATACTCATACTCTTCCTTTTTCAATATTATTGAAGCATTTATCAGGGTTATTG  
TCTCATGAGCGGATACATATTTGAATGTATTTAGAAAAATAAACAAATAGGGGTTCCGCGCACATTTCCCCGAAAA  
GTGCCACCTGACGTGACGGATCGGGAGATCTCCCGATCCCCTATGGTGCCTCTCAGTACAATCTGCTCTGAT  
GCCGCATAGTTAAGCCAGTATCTGCTCCCTGCTTGTGTGTTGGAGGTCGCTGAGTAGTGCGCGAGCAAAATTTA  
AGCTACAACAAGGCAAGGCTTGACCGACAATTGCATGAAGAATCTGCTTAGGGTTAGCGTTTTGCGCTGCTTC  
GCGATGTACGGGCCAGATATACGCGTT
